# Supplementary material
Source: MDPI journal article supplement (https://www.mdpi.com/1099-4300/23/6/646)
Supplement: s1 [file s1]

# Supplementary Material

## A New Regression Model for the Analysis of Overdispersed and Zero-modified Count Data

Wesley Bertoli, Katiane S. Conceição,  
Marinho G. Andrade and Francisco Louzada

### **Abstract**

This supplementary material contains all the results obtained from the Monte Carlo simulation study described in Section 4 of the manuscript. In all Figures, the straight blue lines represent the actual values, and the 95% HPDIs are represented by the dashed red lines. The filled black dots represent the estimated values for each generated observation.

# 1 Zero-inflated artificial data

## 1.1 Using *logit* link function

Table 1: Empirical properties of the Bayesian estimators using zero-inflated artificial samples (Scenarios 1 and 2).

| $n$        | Parameter    | Bias   | MSE   | $\sqrt{\frac{\text{MSE}}{\text{Var}}}$ | MAPE (%) |
|------------|--------------|--------|-------|----------------------------------------|----------|
| Scenario 1 |              |        |       |                                        |          |
| 50         | $\beta_{10}$ | -0.116 | 0.336 | 1.020                                  | 29.127   |
|            | $\beta_{11}$ | -0.527 | 1.784 | 1.088                                  | 30.652   |
|            | $\beta_{20}$ | 0.119  | 0.329 | 1.022                                  | 45.714   |
|            | $\beta_{21}$ | 0.116  | 0.990 | 1.007                                  | 78.781   |
| 100        | $\beta_{10}$ | -0.097 | 0.161 | 1.031                                  | 20.605   |
|            | $\beta_{11}$ | -0.138 | 0.480 | 1.020                                  | 18.120   |
|            | $\beta_{20}$ | 0.084  | 0.247 | 1.014                                  | 40.288   |
|            | $\beta_{21}$ | 0.053  | 0.774 | 1.002                                  | 70.962   |
| 200        | $\beta_{10}$ | -0.033 | 0.058 | 1.010                                  | 12.471   |
|            | $\beta_{11}$ | -0.098 | 0.193 | 1.026                                  | 11.590   |
|            | $\beta_{20}$ | 0.012  | 0.110 | 1.001                                  | 26.005   |
|            | $\beta_{21}$ | 0.061  | 0.412 | 1.004                                  | 50.919   |
| 500        | $\beta_{10}$ | -0.032 | 0.022 | 1.024                                  | 7.870    |
|            | $\beta_{11}$ | -0.011 | 0.064 | 1.001                                  | 6.794    |
|            | $\beta_{20}$ | 0.009  | 0.049 | 1.001                                  | 17.633   |
|            | $\beta_{21}$ | 0.023  | 0.169 | 1.002                                  | 33.136   |
| Scenario 2 |              |        |       |                                        |          |
| 50         | $\beta_{10}$ | -0.164 | 0.180 | 1.085                                  | 21.689   |
|            | $\beta_{11}$ | -0.136 | 0.382 | 1.025                                  | 16.319   |
|            | $\beta_{20}$ | 0.128  | 0.328 | 1.026                                  | 45.883   |
|            | $\beta_{21}$ | -0.081 | 0.896 | 1.004                                  | 151.990  |
| 100        | $\beta_{10}$ | -0.078 | 0.094 | 1.034                                  | 15.908   |
|            | $\beta_{11}$ | -0.075 | 0.204 | 1.014                                  | 11.916   |
|            | $\beta_{20}$ | 0.049  | 0.217 | 1.006                                  | 36.781   |
|            | $\beta_{21}$ | -0.016 | 0.574 | 1.000                                  | 117.390  |
| 200        | $\beta_{10}$ | -0.051 | 0.044 | 1.031                                  | 11.079   |
|            | $\beta_{11}$ | -0.010 | 0.104 | 1.000                                  | 8.443    |
|            | $\beta_{20}$ | 0.010  | 0.101 | 1.000                                  | 25.223   |
|            | $\beta_{21}$ | 0.013  | 0.322 | 1.000                                  | 90.972   |
| 500        | $\beta_{10}$ | -0.024 | 0.015 | 1.019                                  | 6.533    |
|            | $\beta_{11}$ | -0.005 | 0.033 | 1.000                                  | 4.778    |
|            | $\beta_{20}$ | 0.005  | 0.039 | 1.000                                  | 15.802   |
|            | $\beta_{21}$ | 0.002  | 0.104 | 1.000                                  | 52.292   |

Table 2: Empirical properties of the Bayesian estimators using zero-inflated artificial samples (Scenarios 3 and 4).

| $n$        | Parameter    | Bias   | MSE   | $\sqrt{\frac{\text{MSE}}{\text{Var}}}$ | MAPE (%) |
|------------|--------------|--------|-------|----------------------------------------|----------|
| Scenario 3 |              |        |       |                                        |          |
| 50         | $\beta_{10}$ | -0.338 | 0.584 | 1.115                                  | 37.493   |
|            | $\beta_{11}$ | 0.281  | 1.758 | 1.023                                  | 69.019   |
|            | $\beta_{20}$ | 0.109  | 0.388 | 1.016                                  | 49.700   |
|            | $\beta_{21}$ | 0.186  | 1.102 | 1.016                                  | 84.008   |
| 100        | $\beta_{10}$ | -0.120 | 0.241 | 1.032                                  | 24.811   |
|            | $\beta_{11}$ | -0.036 | 1.045 | 1.001                                  | 52.507   |
|            | $\beta_{20}$ | 0.056  | 0.222 | 1.007                                  | 38.480   |
|            | $\beta_{21}$ | 0.104  | 0.681 | 1.008                                  | 67.186   |
| 200        | $\beta_{10}$ | -0.071 | 0.105 | 1.025                                  | 16.547   |
|            | $\beta_{11}$ | -0.005 | 0.526 | 1.000                                  | 38.617   |
|            | $\beta_{20}$ | 0.006  | 0.106 | 1.000                                  | 25.932   |
|            | $\beta_{21}$ | 0.066  | 0.405 | 1.005                                  | 50.259   |
| 500        | $\beta_{10}$ | -0.024 | 0.039 | 1.008                                  | 10.202   |
|            | $\beta_{11}$ | -0.002 | 0.171 | 1.000                                  | 21.413   |
|            | $\beta_{20}$ | 0.005  | 0.051 | 1.000                                  | 17.858   |
|            | $\beta_{21}$ | 0.043  | 0.166 | 1.006                                  | 32.488   |
| Scenario 4 |              |        |       |                                        |          |
| 50         | $\beta_{10}$ | -0.221 | 0.386 | 1.070                                  | 31.170   |
|            | $\beta_{11}$ | 0.138  | 1.024 | 1.009                                  | 54.128   |
|            | $\beta_{20}$ | 0.086  | 0.380 | 1.010                                  | 48.477   |
|            | $\beta_{21}$ | -0.063 | 1.108 | 1.002                                  | 165.519  |
| 100        | $\beta_{10}$ | -0.114 | 0.192 | 1.035                                  | 23.082   |
|            | $\beta_{11}$ | 0.062  | 0.584 | 1.003                                  | 41.147   |
|            | $\beta_{20}$ | 0.068  | 0.218 | 1.011                                  | 37.185   |
|            | $\beta_{21}$ | -0.076 | 0.700 | 1.004                                  | 133.345  |
| 200        | $\beta_{10}$ | -0.052 | 0.067 | 1.021                                  | 13.693   |
|            | $\beta_{11}$ | 0.011  | 0.236 | 1.000                                  | 26.593   |
|            | $\beta_{20}$ | 0.040  | 0.080 | 1.010                                  | 22.414   |
|            | $\beta_{21}$ | -0.033 | 0.269 | 1.002                                  | 81.162   |
| 500        | $\beta_{10}$ | -0.025 | 0.028 | 1.012                                  | 8.884    |
|            | $\beta_{11}$ | 0.022  | 0.093 | 1.002                                  | 16.306   |
|            | $\beta_{20}$ | -0.001 | 0.042 | 1.000                                  | 16.202   |
|            | $\beta_{21}$ | 0.010  | 0.118 | 1.000                                  | 54.116   |

Table 3: *Posterior* estimates for model parameters using zero-inflated artificial samples (Scenarios 1 and 2).

| $n$        | Parameter    | Mean   | Median | Std. Dev. | 95% HPDI |        |
|------------|--------------|--------|--------|-----------|----------|--------|
|            |              |        |        |           | Lower    | Upper  |
| Scenario 1 |              |        |        |           |          |        |
| 50         | $\beta_{10}$ | 1.384  | 1.386  | 0.568     | 0.416    | 2.348  |
|            | $\beta_{11}$ | 2.473  | 2.461  | 1.228     | 0.736    | 4.230  |
|            | $\beta_{20}$ | -0.881 | -0.865 | 0.561     | -2.184   | 0.395  |
|            | $\beta_{21}$ | -0.884 | -0.873 | 0.988     | -3.221   | 1.432  |
| 100        | $\beta_{10}$ | 1.403  | 1.403  | 0.390     | 0.701    | 2.105  |
|            | $\beta_{11}$ | 2.862  | 2.855  | 0.679     | 1.631    | 4.105  |
|            | $\beta_{20}$ | -0.916 | -0.907 | 0.490     | -1.932   | 0.080  |
|            | $\beta_{21}$ | -0.947 | -0.942 | 0.878     | -2.784   | 0.878  |
| 200        | $\beta_{10}$ | 1.467  | 1.467  | 0.238     | 1.031    | 1.903  |
|            | $\beta_{11}$ | 2.902  | 2.897  | 0.428     | 2.089    | 3.721  |
|            | $\beta_{20}$ | -0.988 | -0.983 | 0.332     | -1.635   | -0.346 |
|            | $\beta_{21}$ | -0.939 | -0.933 | 0.639     | -2.219   | 0.332  |
| 500        | $\beta_{10}$ | 1.468  | 1.468  | 0.147     | 1.188    | 1.748  |
|            | $\beta_{11}$ | 2.989  | 2.987  | 0.253     | 2.505    | 3.476  |
|            | $\beta_{20}$ | -0.991 | -0.988 | 0.220     | -1.414   | -0.571 |
|            | $\beta_{21}$ | -0.977 | -0.975 | 0.410     | -1.758   | -0.200 |
| Scenario 2 |              |        |        |           |          |        |
| 50         | $\beta_{10}$ | 1.336  | 1.336  | 0.391     | 0.588    | 2.087  |
|            | $\beta_{11}$ | 2.864  | 2.858  | 0.603     | 1.725    | 4.011  |
|            | $\beta_{20}$ | -0.872 | -0.860 | 0.558     | -2.071   | 0.308  |
|            | $\beta_{21}$ | 0.419  | 0.416  | 0.943     | -1.571   | 2.415  |
| 100        | $\beta_{10}$ | 1.422  | 1.422  | 0.296     | 0.849    | 1.997  |
|            | $\beta_{11}$ | 2.925  | 2.922  | 0.445     | 2.023    | 3.828  |
|            | $\beta_{20}$ | -0.951 | -0.943 | 0.464     | -1.880   | -0.032 |
|            | $\beta_{21}$ | 0.484  | 0.479  | 0.758     | -1.071   | 2.052  |
| 200        | $\beta_{10}$ | 1.449  | 1.449  | 0.204     | 1.082    | 1.814  |
|            | $\beta_{11}$ | 2.990  | 2.989  | 0.322     | 2.395    | 3.590  |
|            | $\beta_{20}$ | -0.990 | -0.986 | 0.318     | -1.582   | -0.404 |
|            | $\beta_{21}$ | 0.513  | 0.513  | 0.567     | -0.546   | 1.569  |
| 500        | $\beta_{10}$ | 1.476  | 1.476  | 0.121     | 1.239    | 1.714  |
|            | $\beta_{11}$ | 2.995  | 2.994  | 0.181     | 2.631    | 3.359  |
|            | $\beta_{20}$ | -0.995 | -0.993 | 0.198     | -1.380   | -0.611 |
|            | $\beta_{21}$ | 0.502  | 0.502  | 0.322     | -0.139   | 1.147  |

Table 4: *Posterior* estimates for model parameters using zero-inflated artificial samples (Scenarios 3 and 4).

| $n$        | Parameter    | Mean   | Median | Std. Dev. | 95% HPDI |        |
|------------|--------------|--------|--------|-----------|----------|--------|
|            |              |        |        |           | Lower    | Upper  |
| Scenario 3 |              |        |        |           |          |        |
| 50         | $\beta_{10}$ | 1.162  | 1.175  | 0.685     | -0.184   | 2.482  |
|            | $\beta_{11}$ | -1.219 | -1.208 | 1.296     | -3.982   | 1.521  |
|            | $\beta_{20}$ | -0.891 | -0.875 | 0.613     | -2.200   | 0.382  |
|            | $\beta_{21}$ | -0.814 | -0.802 | 1.033     | -3.143   | 1.484  |
| 100        | $\beta_{10}$ | 1.380  | 1.386  | 0.476     | 0.414    | 2.335  |
|            | $\beta_{11}$ | -1.536 | -1.529 | 1.021     | -3.569   | 0.479  |
|            | $\beta_{20}$ | -0.944 | -0.933 | 0.468     | -1.960   | 0.057  |
|            | $\beta_{21}$ | -0.896 | -0.891 | 0.819     | -2.729   | 0.928  |
| 200        | $\beta_{10}$ | 1.429  | 1.432  | 0.317     | 0.846    | 2.009  |
|            | $\beta_{11}$ | -1.505 | -1.499 | 0.725     | -2.882   | -0.138 |
|            | $\beta_{20}$ | -0.994 | -0.989 | 0.325     | -1.644   | -0.353 |
|            | $\beta_{21}$ | -0.934 | -0.929 | 0.633     | -2.218   | 0.335  |
| 500        | $\beta_{10}$ | 1.476  | 1.477  | 0.196     | 1.108    | 1.843  |
|            | $\beta_{11}$ | -1.502 | -1.500 | 0.413     | -2.317   | -0.690 |
|            | $\beta_{20}$ | -0.995 | -0.993 | 0.225     | -1.418   | -0.575 |
|            | $\beta_{21}$ | -0.957 | -0.956 | 0.406     | -1.736   | -0.182 |
| Scenario 4 |              |        |        |           |          |        |
| 50         | $\beta_{10}$ | 1.279  | 1.287  | 0.581     | 0.141    | 2.402  |
|            | $\beta_{11}$ | -1.363 | -1.356 | 1.003     | -3.430   | 0.697  |
|            | $\beta_{20}$ | -0.914 | -0.901 | 0.610     | -2.122   | 0.275  |
|            | $\beta_{21}$ | 0.437  | 0.434  | 1.051     | -1.570   | 2.445  |
| 100        | $\beta_{10}$ | 1.386  | 1.391  | 0.424     | 0.567    | 2.198  |
|            | $\beta_{11}$ | -1.438 | -1.437 | 0.762     | -2.947   | 0.066  |
|            | $\beta_{20}$ | -0.932 | -0.925 | 0.462     | -1.860   | -0.016 |
|            | $\beta_{21}$ | 0.424  | 0.421  | 0.834     | -1.137   | 1.991  |
| 200        | $\beta_{10}$ | 1.448  | 1.450  | 0.253     | 0.945    | 1.949  |
|            | $\beta_{11}$ | -1.489 | -1.487 | 0.486     | -2.502   | -0.477 |
|            | $\beta_{20}$ | -0.960 | -0.957 | 0.280     | -1.549   | -0.376 |
|            | $\beta_{21}$ | 0.467  | 0.466  | 0.518     | -0.587   | 1.522  |
| 500        | $\beta_{10}$ | 1.475  | 1.476  | 0.166     | 1.150    | 1.799  |
|            | $\beta_{11}$ | -1.478 | -1.478 | 0.304     | -2.083   | -0.873 |
|            | $\beta_{20}$ | -1.001 | -1.000 | 0.204     | -1.388   | -0.616 |
|            | $\beta_{21}$ | 0.510  | 0.509  | 0.343     | -0.133   | 1.155  |

Table 5: Coverage probabilities (%) of the HPDIs using zero-inflated artificial samples (Scenarios 1 and 2).

| $n$ | Parameter    | BNCP       | CP    | ANCP  | BNCP       | CP    | ANCP |
|-----|--------------|------------|-------|-------|------------|-------|------|
|     |              | Scenario 1 |       |       | Scenario 2 |       |      |
| 50  | $\beta_{10}$ | 3.00       | 92.80 | 4.20  | 1.00       | 93.80 | 5.20 |
|     | $\beta_{11}$ | 1.00       | 88.00 | 11.00 | 1.80       | 93.40 | 4.80 |
|     | $\beta_{20}$ | 1.80       | 98.20 | 0.00  | 3.60       | 95.80 | 0.60 |
|     | $\beta_{21}$ | 1.60       | 98.00 | 0.40  | 1.00       | 97.60 | 1.40 |
| 100 | $\beta_{10}$ | 2.20       | 93.60 | 4.20  | 1.60       | 94.00 | 4.40 |
|     | $\beta_{11}$ | 1.80       | 92.60 | 5.60  | 1.20       | 95.20 | 3.60 |
|     | $\beta_{20}$ | 1.80       | 97.20 | 1.00  | 4.00       | 94.40 | 1.60 |
|     | $\beta_{21}$ | 2.00       | 97.20 | 0.80  | 2.00       | 95.00 | 3.00 |
| 200 | $\beta_{10}$ | 1.60       | 93.00 | 5.40  | 2.40       | 92.60 | 5.00 |
|     | $\beta_{11}$ | 1.60       | 93.20 | 5.20  | 2.20       | 94.00 | 3.80 |
|     | $\beta_{20}$ | 3.20       | 95.00 | 1.80  | 3.80       | 94.00 | 2.20 |
|     | $\beta_{21}$ | 3.00       | 95.60 | 1.40  | 3.20       | 93.80 | 3.00 |
| 500 | $\beta_{10}$ | 1.20       | 94.00 | 4.80  | 1.00       | 95.40 | 3.60 |
|     | $\beta_{11}$ | 2.60       | 94.60 | 2.80  | 1.40       | 96.00 | 2.60 |
|     | $\beta_{20}$ | 2.40       | 95.20 | 2.40  | 3.20       | 94.80 | 2.00 |
|     | $\beta_{21}$ | 2.60       | 95.20 | 2.20  | 2.40       | 95.40 | 2.20 |

Table 6: Coverage probabilities (%) of the HPDIs using zero-inflated artificial samples (Scenarios 3 and 4).

| $n$ | Parameter    | BNCP       | CP    | ANCP | BNCP       | CP    | ANCP |
|-----|--------------|------------|-------|------|------------|-------|------|
|     |              | Scenario 3 |       |      | Scenario 4 |       |      |
| 50  | $\beta_{10}$ | 0.40       | 95.40 | 4.20 | 0.20       | 96.80 | 3.00 |
|     | $\beta_{11}$ | 3.20       | 96.40 | 0.40 | 2.40       | 97.00 | 0.60 |
|     | $\beta_{20}$ | 2.20       | 97.40 | 0.40 | 4.60       | 94.40 | 1.00 |
|     | $\beta_{21}$ | 1.80       | 97.60 | 0.60 | 1.80       | 94.80 | 3.40 |
| 100 | $\beta_{10}$ | 1.40       | 95.80 | 2.80 | 1.20       | 95.00 | 3.80 |
|     | $\beta_{11}$ | 2.20       | 96.20 | 1.60 | 2.60       | 95.00 | 2.40 |
|     | $\beta_{20}$ | 2.40       | 97.40 | 0.20 | 4.20       | 94.60 | 1.20 |
|     | $\beta_{21}$ | 1.80       | 97.60 | 0.60 | 1.80       | 93.60 | 4.60 |
| 200 | $\beta_{10}$ | 2.00       | 94.40 | 3.60 | 1.20       | 96.60 | 2.20 |
|     | $\beta_{11}$ | 3.20       | 95.00 | 1.80 | 1.80       | 97.00 | 1.20 |
|     | $\beta_{20}$ | 2.20       | 96.20 | 1.60 | 3.20       | 95.80 | 1.00 |
|     | $\beta_{21}$ | 2.80       | 95.60 | 1.60 | 2.40       | 94.40 | 3.20 |
| 500 | $\beta_{10}$ | 2.20       | 94.40 | 3.40 | 2.20       | 95.80 | 2.00 |
|     | $\beta_{11}$ | 2.40       | 94.80 | 2.80 | 2.40       | 95.40 | 2.20 |
|     | $\beta_{20}$ | 3.80       | 94.40 | 1.80 | 2.20       | 95.00 | 2.80 |
|     | $\beta_{21}$ | 2.80       | 95.20 | 2.00 | 3.40       | 94.60 | 2.00 |

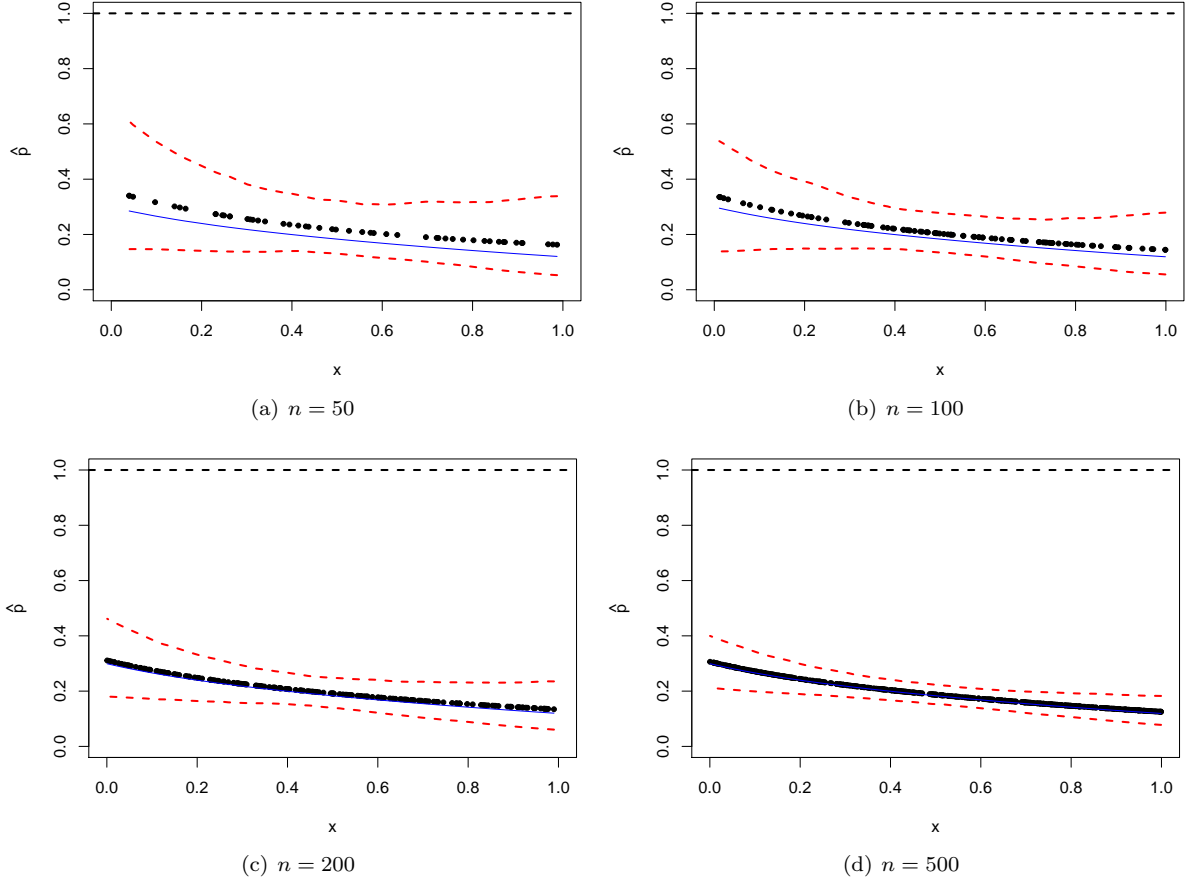

Figure 1: *Posterior* estimates for parameter  $p$  using zero-inflated artificial samples (Scenario 1).

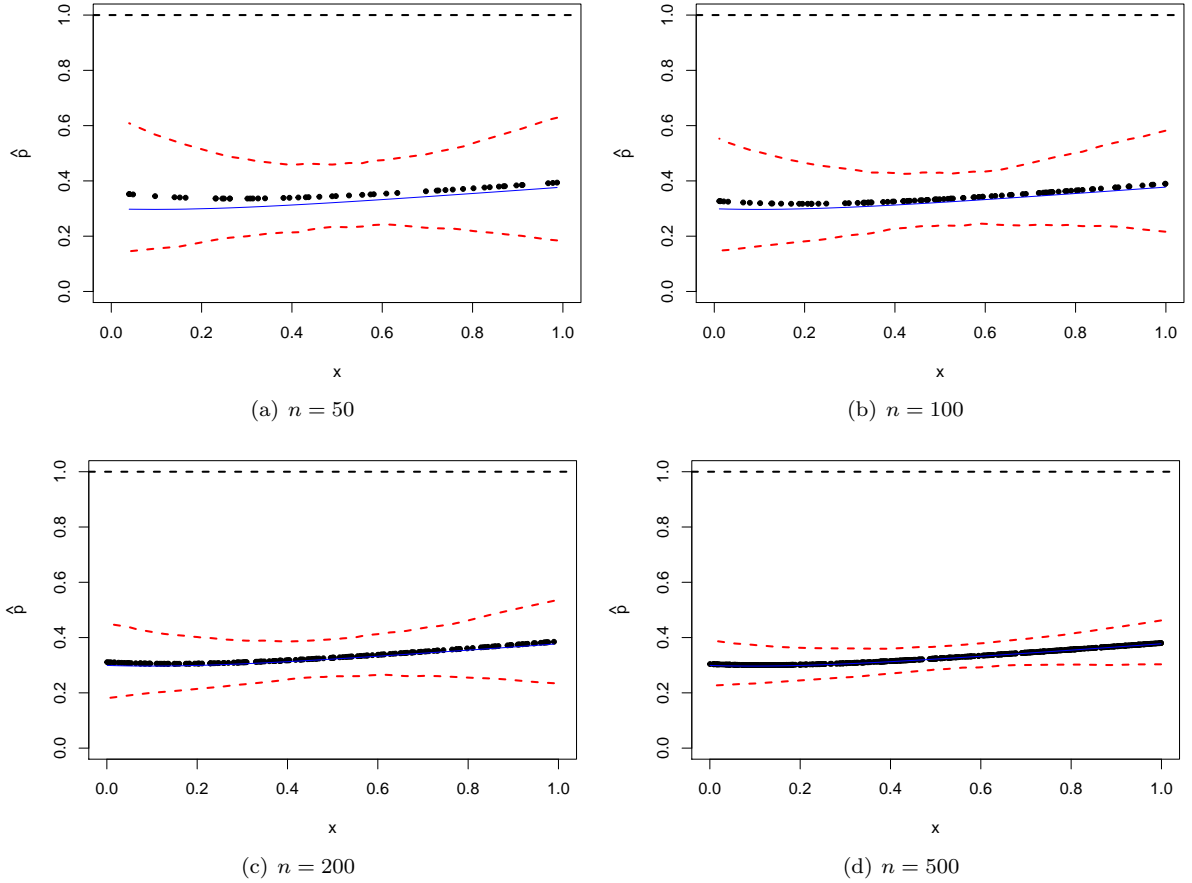

Figure 2: *Posterior* estimates for parameter  $p$  using zero-inflated artificial samples (Scenario 2).

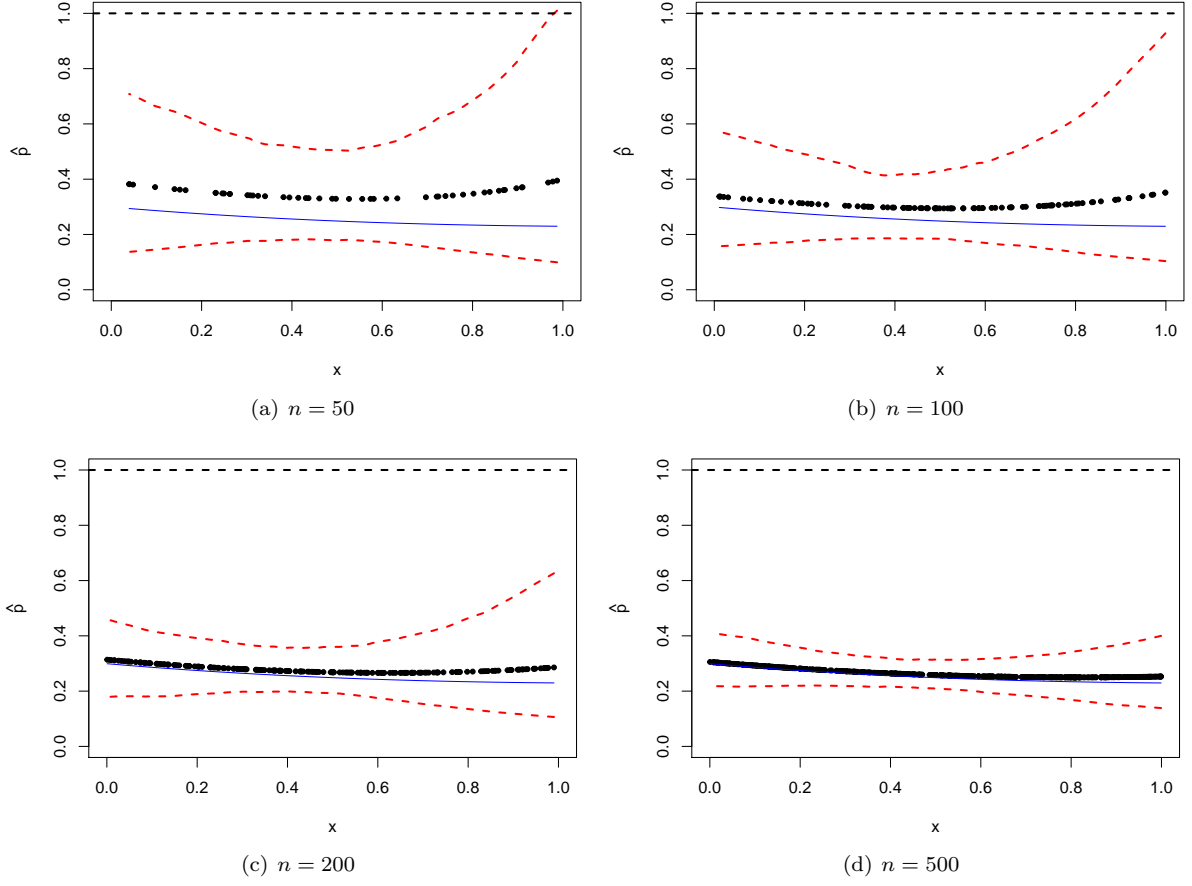

Figure 3: *Posterior* estimates for parameter  $p$  using zero-inflated artificial samples (Scenario 3).

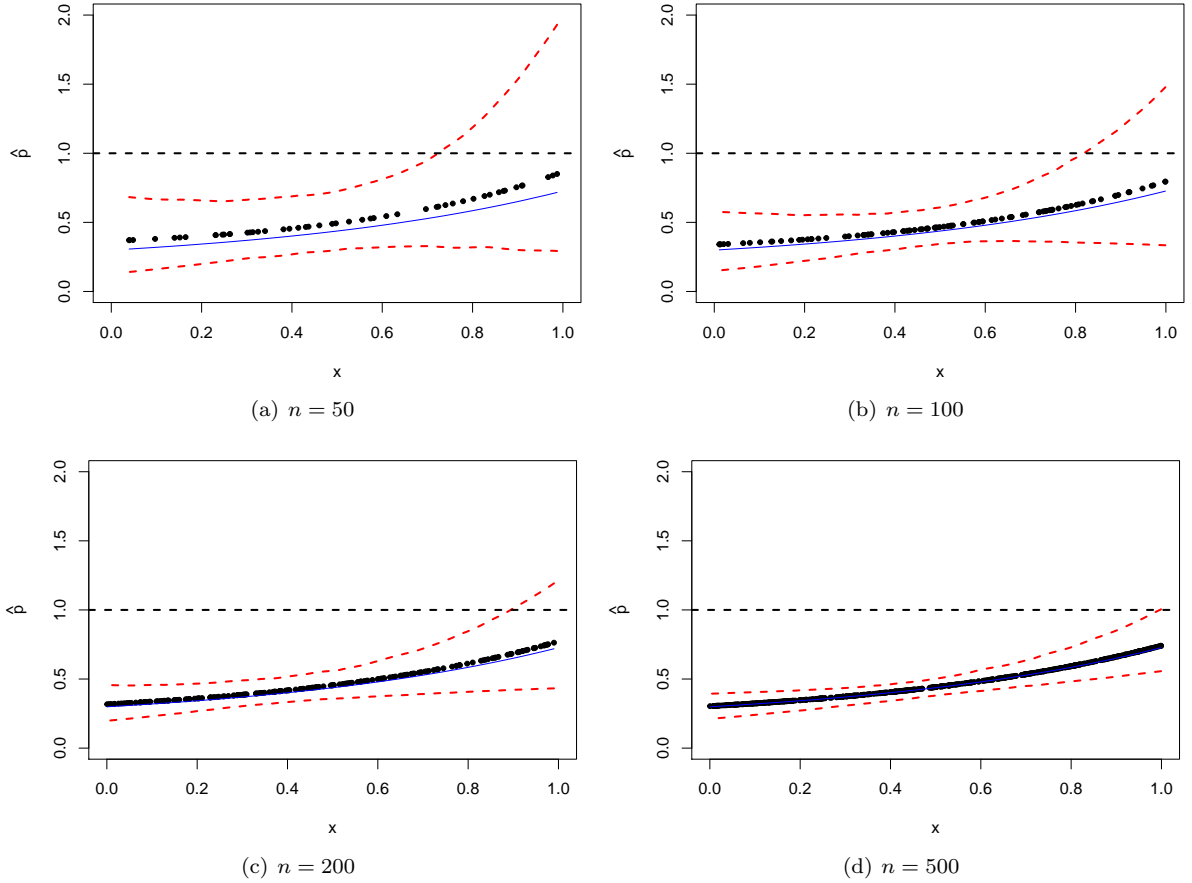

Figure 4: *Posterior* estimates for parameter  $p$  using zero-inflated artificial samples (Scenario 4).



## 1.2 Using *probit* link function

Table 7: Empirical properties of the Bayesian estimators using zero-inflated artificial samples (Scenarios 1 and 2).

| $n$        | Parameter    | Bias   | MSE   | $\sqrt{\frac{\text{MSE}}{\text{Var}}}$ | MAPE (%) |
|------------|--------------|--------|-------|----------------------------------------|----------|
| Scenario 1 |              |        |       |                                        |          |
| 50         | $\beta_{10}$ | −0.013 | 0.992 | 1.000                                  | 49.716   |
|            | $\beta_{11}$ | −1.969 | 9.844 | 1.284                                  | 81.167   |
|            | $\beta_{20}$ | 0.020  | 0.214 | 1.001                                  | 36.875   |
|            | $\beta_{21}$ | 0.191  | 0.754 | 1.025                                  | 69.121   |
| 100        | $\beta_{10}$ | −0.007 | 0.415 | 1.000                                  | 32.842   |
|            | $\beta_{11}$ | −0.847 | 3.051 | 1.144                                  | 42.982   |
|            | $\beta_{20}$ | 0.003  | 0.148 | 1.000                                  | 30.516   |
|            | $\beta_{21}$ | 0.063  | 0.564 | 1.004                                  | 59.161   |
| 200        | $\beta_{10}$ | −0.010 | 0.134 | 1.000                                  | 18.566   |
|            | $\beta_{11}$ | −0.405 | 1.003 | 1.093                                  | 24.666   |
|            | $\beta_{20}$ | 0.009  | 0.054 | 1.001                                  | 18.170   |
|            | $\beta_{21}$ | 0.010  | 0.266 | 1.000                                  | 40.134   |
| 500        | $\beta_{10}$ | −0.005 | 0.052 | 1.000                                  | 12.110   |
|            | $\beta_{11}$ | −0.138 | 0.236 | 1.043                                  | 12.837   |
|            | $\beta_{20}$ | 0.001  | 0.025 | 1.000                                  | 12.704   |
|            | $\beta_{21}$ | 0.004  | 0.096 | 1.000                                  | 24.369   |
| Scenario 2 |              |        |       |                                        |          |
| 50         | $\beta_{10}$ | −0.213 | 0.299 | 1.086                                  | 27.133   |
|            | $\beta_{11}$ | −0.117 | 0.586 | 1.012                                  | 19.488   |
|            | $\beta_{20}$ | 0.052  | 0.180 | 1.008                                  | 33.672   |
|            | $\beta_{21}$ | −0.026 | 0.497 | 1.001                                  | 108.882  |
| 100        | $\beta_{10}$ | −0.131 | 0.143 | 1.066                                  | 19.972   |
|            | $\beta_{11}$ | −0.026 | 0.292 | 1.001                                  | 14.063   |
|            | $\beta_{20}$ | 0.003  | 0.108 | 1.000                                  | 26.370   |
|            | $\beta_{21}$ | −0.002 | 0.311 | 1.000                                  | 89.775   |
| 200        | $\beta_{10}$ | −0.056 | 0.055 | 1.030                                  | 12.321   |
|            | $\beta_{11}$ | −0.018 | 0.121 | 1.001                                  | 9.102    |
|            | $\beta_{20}$ | −0.002 | 0.035 | 1.000                                  | 15.016   |
|            | $\beta_{21}$ | 0.006  | 0.114 | 1.000                                  | 54.306   |
| 500        | $\beta_{10}$ | −0.030 | 0.024 | 1.020                                  | 8.184    |
|            | $\beta_{11}$ | 0.004  | 0.052 | 1.000                                  | 6.078    |
|            | $\beta_{20}$ | 0.003  | 0.016 | 1.000                                  | 10.023   |
|            | $\beta_{21}$ | −0.004 | 0.043 | 1.000                                  | 32.685   |

Table 8: Empirical properties of the Bayesian estimators using zero-inflated artificial samples (Scenarios 3 and 4).

| $n$        | Parameter    | Bias   | MSE   | $\sqrt{\frac{\text{MSE}}{\text{Var}}}$ | MAPE (%) |
|------------|--------------|--------|-------|----------------------------------------|----------|
| Scenario 3 |              |        |       |                                        |          |
| 50         | $\beta_{10}$ | -0.558 | 1.168 | 1.167                                  | 54.835   |
|            | $\beta_{11}$ | 0.371  | 2.334 | 1.031                                  | 81.328   |
|            | $\beta_{20}$ | 0.064  | 0.217 | 1.009                                  | 37.291   |
|            | $\beta_{21}$ | 0.090  | 0.739 | 1.006                                  | 69.044   |
| 100        | $\beta_{10}$ | -0.335 | 0.687 | 1.093                                  | 41.996   |
|            | $\beta_{11}$ | 0.157  | 2.126 | 1.006                                  | 79.353   |
|            | $\beta_{20}$ | 0.000  | 0.142 | 1.000                                  | 29.447   |
|            | $\beta_{21}$ | 0.085  | 0.498 | 1.007                                  | 54.999   |
| 200        | $\beta_{10}$ | -0.131 | 0.215 | 1.042                                  | 23.877   |
|            | $\beta_{11}$ | -0.013 | 1.186 | 1.000                                  | 57.991   |
|            | $\beta_{20}$ | 0.008  | 0.057 | 1.001                                  | 18.644   |
|            | $\beta_{21}$ | 0.024  | 0.260 | 1.001                                  | 39.806   |
| 500        | $\beta_{10}$ | -0.043 | 0.078 | 1.012                                  | 14.353   |
|            | $\beta_{11}$ | -0.058 | 0.534 | 1.003                                  | 37.506   |
|            | $\beta_{20}$ | 0.007  | 0.022 | 1.001                                  | 11.511   |
|            | $\beta_{21}$ | -0.001 | 0.092 | 1.000                                  | 23.509   |
| Scenario 4 |              |        |       |                                        |          |
| 50         | $\beta_{10}$ | -0.300 | 0.621 | 1.081                                  | 39.539   |
|            | $\beta_{11}$ | 0.201  | 1.467 | 1.014                                  | 64.091   |
|            | $\beta_{20}$ | 0.101  | 0.173 | 1.031                                  | 33.391   |
|            | $\beta_{21}$ | -0.119 | 0.464 | 1.016                                  | 107.901  |
| 100        | $\beta_{10}$ | -0.116 | 0.306 | 1.023                                  | 28.224   |
|            | $\beta_{11}$ | 0.066  | 0.849 | 1.003                                  | 47.504   |
|            | $\beta_{20}$ | -0.017 | 0.099 | 1.002                                  | 24.656   |
|            | $\beta_{21}$ | 0.045  | 0.269 | 1.004                                  | 82.445   |
| 200        | $\beta_{10}$ | -0.089 | 0.115 | 1.036                                  | 17.815   |
|            | $\beta_{11}$ | 0.058  | 0.372 | 1.005                                  | 32.020   |
|            | $\beta_{20}$ | 0.001  | 0.042 | 1.000                                  | 16.520   |
|            | $\beta_{21}$ | 0.016  | 0.132 | 1.001                                  | 57.849   |
| 500        | $\beta_{10}$ | -0.026 | 0.041 | 1.008                                  | 10.693   |
|            | $\beta_{11}$ | 0.001  | 0.136 | 1.000                                  | 19.688   |
|            | $\beta_{20}$ | 0.000  | 0.015 | 1.000                                  | 9.807    |
|            | $\beta_{21}$ | 0.014  | 0.042 | 1.002                                  | 33.297   |

Table 9: *Posterior* estimates for model parameters using zero-inflated artificial samples (Scenarios 1 and 2).

| $n$        | Parameter    | Mean   | Median | Std. Dev. | 95% HPDI |        |
|------------|--------------|--------|--------|-----------|----------|--------|
|            |              |        |        |           | Lower    | Upper  |
| Scenario 1 |              |        |        |           |          |        |
| 50         | $\beta_{10}$ | 1.487  | 1.490  | 0.996     | -0.136   | 3.104  |
|            | $\beta_{11}$ | 1.031  | 1.022  | 2.442     | -2.290   | 4.386  |
|            | $\beta_{20}$ | -0.980 | -0.964 | 0.462     | -1.971   | -0.013 |
|            | $\beta_{21}$ | -0.809 | -0.784 | 0.847     | -2.737   | 1.072  |
| 100        | $\beta_{10}$ | 1.493  | 1.495  | 0.644     | 0.330    | 2.654  |
|            | $\beta_{11}$ | 2.153  | 2.141  | 1.527     | -0.182   | 4.495  |
|            | $\beta_{20}$ | -0.997 | -0.988 | 0.384     | -1.754   | -0.256 |
|            | $\beta_{21}$ | -0.937 | -0.926 | 0.748     | -2.419   | 0.521  |
| 200        | $\beta_{10}$ | 1.490  | 1.491  | 0.367     | 0.818    | 2.158  |
|            | $\beta_{11}$ | 2.595  | 2.585  | 0.916     | 1.128    | 4.080  |
|            | $\beta_{20}$ | -0.991 | -0.988 | 0.233     | -1.458   | -0.528 |
|            | $\beta_{21}$ | -0.990 | -0.980 | 0.516     | -2.004   | 0.015  |
| 500        | $\beta_{10}$ | 1.495  | 1.495  | 0.228     | 1.078    | 1.911  |
|            | $\beta_{11}$ | 2.862  | 2.857  | 0.465     | 2.022    | 3.707  |
|            | $\beta_{20}$ | -0.999 | -0.998 | 0.158     | -1.300   | -0.701 |
|            | $\beta_{21}$ | -0.996 | -0.993 | 0.310     | -1.602   | -0.392 |
| Scenario 2 |              |        |        |           |          |        |
| 50         | $\beta_{10}$ | 1.287  | 1.286  | 0.504     | 0.339    | 2.232  |
|            | $\beta_{11}$ | 2.883  | 2.876  | 0.757     | 1.478    | 4.296  |
|            | $\beta_{20}$ | -0.948 | -0.939 | 0.421     | -1.767   | -0.139 |
|            | $\beta_{21}$ | 0.474  | 0.470  | 0.704     | -0.863   | 1.819  |
| 100        | $\beta_{10}$ | 1.369  | 1.369  | 0.355     | 0.656    | 2.079  |
|            | $\beta_{11}$ | 2.974  | 2.970  | 0.540     | 1.887    | 4.067  |
|            | $\beta_{20}$ | -0.997 | -0.992 | 0.328     | -1.623   | -0.380 |
|            | $\beta_{21}$ | 0.498  | 0.495  | 0.558     | -0.536   | 1.537  |
| 200        | $\beta_{10}$ | 1.444  | 1.443  | 0.227     | 0.991    | 1.897  |
|            | $\beta_{11}$ | 2.982  | 2.979  | 0.347     | 2.265    | 3.701  |
|            | $\beta_{20}$ | -1.002 | -1.000 | 0.188     | -1.395   | -0.612 |
|            | $\beta_{21}$ | 0.506  | 0.505  | 0.338     | -0.186   | 1.199  |
| 500        | $\beta_{10}$ | 1.470  | 1.470  | 0.152     | 1.176    | 1.763  |
|            | $\beta_{11}$ | 3.004  | 3.003  | 0.228     | 2.568    | 3.443  |
|            | $\beta_{20}$ | -0.997 | -0.996 | 0.124     | -1.252   | -0.742 |
|            | $\beta_{21}$ | 0.496  | 0.496  | 0.207     | 0.077    | 0.917  |

Table 10: *Posterior* estimates for model parameters using zero-inflated artificial samples (Scenarios 3 and 4).

| $n$        | Parameter    | Mean   | Median | Std. Dev. | 95% HPDI |        |
|------------|--------------|--------|--------|-----------|----------|--------|
|            |              |        |        |           | Lower    | Upper  |
| Scenario 3 |              |        |        |           |          |        |
| 50         | $\beta_{10}$ | 0.942  | 0.961  | 0.926     | -1.084   | 2.925  |
|            | $\beta_{11}$ | -1.129 | -1.127 | 1.482     | -5.479   | 3.199  |
|            | $\beta_{20}$ | -0.936 | -0.922 | 0.462     | -1.922   | 0.025  |
|            | $\beta_{21}$ | -0.910 | -0.880 | 0.855     | -2.863   | 0.986  |
| 100        | $\beta_{10}$ | 1.165  | 1.180  | 0.758     | -0.395   | 2.695  |
|            | $\beta_{11}$ | -1.343 | -1.338 | 1.450     | -4.798   | 2.099  |
|            | $\beta_{20}$ | -1.000 | -0.991 | 0.377     | -1.757   | -0.260 |
|            | $\beta_{21}$ | -0.915 | -0.904 | 0.701     | -2.390   | 0.539  |
| 200        | $\beta_{10}$ | 1.369  | 1.375  | 0.445     | 0.502    | 2.224  |
|            | $\beta_{11}$ | -1.513 | -1.501 | 1.089     | -3.844   | 0.809  |
|            | $\beta_{20}$ | -0.992 | -0.989 | 0.238     | -1.458   | -0.532 |
|            | $\beta_{21}$ | -0.976 | -0.966 | 0.510     | -1.984   | 0.019  |
| 500        | $\beta_{10}$ | 1.457  | 1.459  | 0.275     | 0.921    | 1.986  |
|            | $\beta_{11}$ | -1.558 | -1.551 | 0.728     | -2.976   | -0.152 |
|            | $\beta_{20}$ | -0.993 | -0.991 | 0.149     | -1.293   | -0.694 |
|            | $\beta_{21}$ | -1.001 | -0.998 | 0.304     | -1.605   | -0.399 |
| Scenario 4 |              |        |        |           |          |        |
| 50         | $\beta_{10}$ | 1.200  | 1.211  | 0.729     | -0.199   | 2.576  |
|            | $\beta_{11}$ | -1.299 | -1.292 | 1.194     | -3.770   | 1.162  |
|            | $\beta_{20}$ | -0.899 | -0.891 | 0.404     | -1.710   | -0.099 |
|            | $\beta_{21}$ | 0.381  | 0.379  | 0.670     | -0.951   | 1.720  |
| 100        | $\beta_{10}$ | 1.384  | 1.390  | 0.541     | 0.325    | 2.433  |
|            | $\beta_{11}$ | -1.434 | -1.431 | 0.919     | -3.288   | 0.421  |
|            | $\beta_{20}$ | -1.017 | -1.013 | 0.314     | -1.644   | -0.396 |
|            | $\beta_{21}$ | 0.545  | 0.542  | 0.517     | -0.490   | 1.587  |
| 200        | $\beta_{10}$ | 1.411  | 1.414  | 0.327     | 0.772    | 2.041  |
|            | $\beta_{11}$ | -1.442 | -1.440 | 0.607     | -2.652   | -0.232 |
|            | $\beta_{20}$ | -0.999 | -0.997 | 0.205     | -1.392   | -0.610 |
|            | $\beta_{21}$ | 0.516  | 0.516  | 0.363     | -0.175   | 1.208  |
| 500        | $\beta_{10}$ | 1.474  | 1.476  | 0.200     | 1.069    | 1.878  |
|            | $\beta_{11}$ | -1.499 | -1.498 | 0.369     | -2.223   | -0.776 |
|            | $\beta_{20}$ | -1.000 | -0.999 | 0.122     | -1.254   | -0.745 |
|            | $\beta_{21}$ | 0.514  | 0.513  | 0.204     | 0.095    | 0.933  |

Table 11: Coverage probabilities (%) of the HPDIs using zero-inflated artificial samples (Scenarios 1 and 2).

| $n$ | Parameter    | BNCP       | CP    | ANCP  | BNCP       | CP    | ANCP |
|-----|--------------|------------|-------|-------|------------|-------|------|
|     |              | Scenario 1 |       |       | Scenario 2 |       |      |
| 50  | $\beta_{10}$ | 2.60       | 94.60 | 2.80  | 1.20       | 93.20 | 5.60 |
|     | $\beta_{11}$ | 0.80       | 73.80 | 25.40 | 1.60       | 93.60 | 4.80 |
|     | $\beta_{20}$ | 2.40       | 97.40 | 0.20  | 5.20       | 93.80 | 1.00 |
|     | $\beta_{21}$ | 2.40       | 97.60 | 0.00  | 1.60       | 95.20 | 3.20 |
| 100 | $\beta_{10}$ | 2.00       | 96.20 | 1.80  | 1.20       | 95.40 | 3.40 |
|     | $\beta_{11}$ | 0.40       | 87.00 | 12.60 | 1.20       | 95.20 | 3.60 |
|     | $\beta_{20}$ | 4.20       | 94.60 | 1.20  | 3.40       | 95.00 | 1.60 |
|     | $\beta_{21}$ | 3.00       | 95.80 | 1.20  | 3.00       | 93.80 | 3.20 |
| 200 | $\beta_{10}$ | 4.20       | 92.40 | 3.40  | 1.00       | 95.20 | 3.80 |
|     | $\beta_{11}$ | 0.60       | 90.00 | 9.40  | 1.60       | 95.60 | 2.80 |
|     | $\beta_{20}$ | 3.20       | 94.80 | 2.00  | 2.00       | 96.40 | 1.60 |
|     | $\beta_{21}$ | 3.40       | 95.40 | 1.20  | 1.80       | 96.60 | 1.60 |
| 500 | $\beta_{10}$ | 3.40       | 95.20 | 1.40  | 2.80       | 93.60 | 3.60 |
|     | $\beta_{11}$ | 1.00       | 92.60 | 6.40  | 1.60       | 95.00 | 3.40 |
|     | $\beta_{20}$ | 2.80       | 95.20 | 2.00  | 2.20       | 96.40 | 1.40 |
|     | $\beta_{21}$ | 2.60       | 95.40 | 2.00  | 2.20       | 95.60 | 2.20 |

Table 12: Coverage probabilities (%) of the HPDIs using zero-inflated artificial samples (Scenarios 3 and 4).

| $n$ | Parameter    | BNCP       | CP    | ANCP | BNCP       | CP    | ANCP |
|-----|--------------|------------|-------|------|------------|-------|------|
|     |              | Scenario 3 |       |      | Scenario 4 |       |      |
| 50  | $\beta_{10}$ | 0.00       | 98.60 | 1.40 | 1.00       | 96.40 | 2.60 |
|     | $\beta_{11}$ | 0.60       | 99.40 | 0.00 | 2.80       | 96.40 | 0.80 |
|     | $\beta_{20}$ | 3.20       | 96.80 | 0.00 | 4.40       | 94.80 | 0.80 |
|     | $\beta_{21}$ | 2.40       | 97.00 | 0.60 | 1.20       | 94.40 | 4.40 |
| 100 | $\beta_{10}$ | 0.40       | 98.00 | 1.60 | 2.60       | 96.00 | 1.40 |
|     | $\beta_{11}$ | 1.00       | 98.60 | 0.40 | 1.00       | 97.40 | 1.60 |
|     | $\beta_{20}$ | 2.60       | 96.60 | 0.80 | 1.60       | 97.20 | 1.20 |
|     | $\beta_{21}$ | 3.80       | 95.40 | 0.80 | 2.00       | 96.60 | 1.40 |
| 200 | $\beta_{10}$ | 0.40       | 96.60 | 3.00 | 1.80       | 95.60 | 2.60 |
|     | $\beta_{11}$ | 1.20       | 98.00 | 0.80 | 2.20       | 96.20 | 1.60 |
|     | $\beta_{20}$ | 3.00       | 95.00 | 2.00 | 2.60       | 96.20 | 1.20 |
|     | $\beta_{21}$ | 3.80       | 95.80 | 0.40 | 1.60       | 95.40 | 3.00 |
| 500 | $\beta_{10}$ | 1.80       | 96.20 | 2.00 | 2.20       | 96.00 | 1.80 |
|     | $\beta_{11}$ | 2.00       | 95.60 | 2.40 | 2.00       | 95.60 | 2.40 |
|     | $\beta_{20}$ | 3.20       | 94.80 | 2.00 | 2.80       | 95.60 | 1.60 |
|     | $\beta_{21}$ | 1.80       | 96.40 | 1.80 | 2.00       | 96.20 | 1.80 |

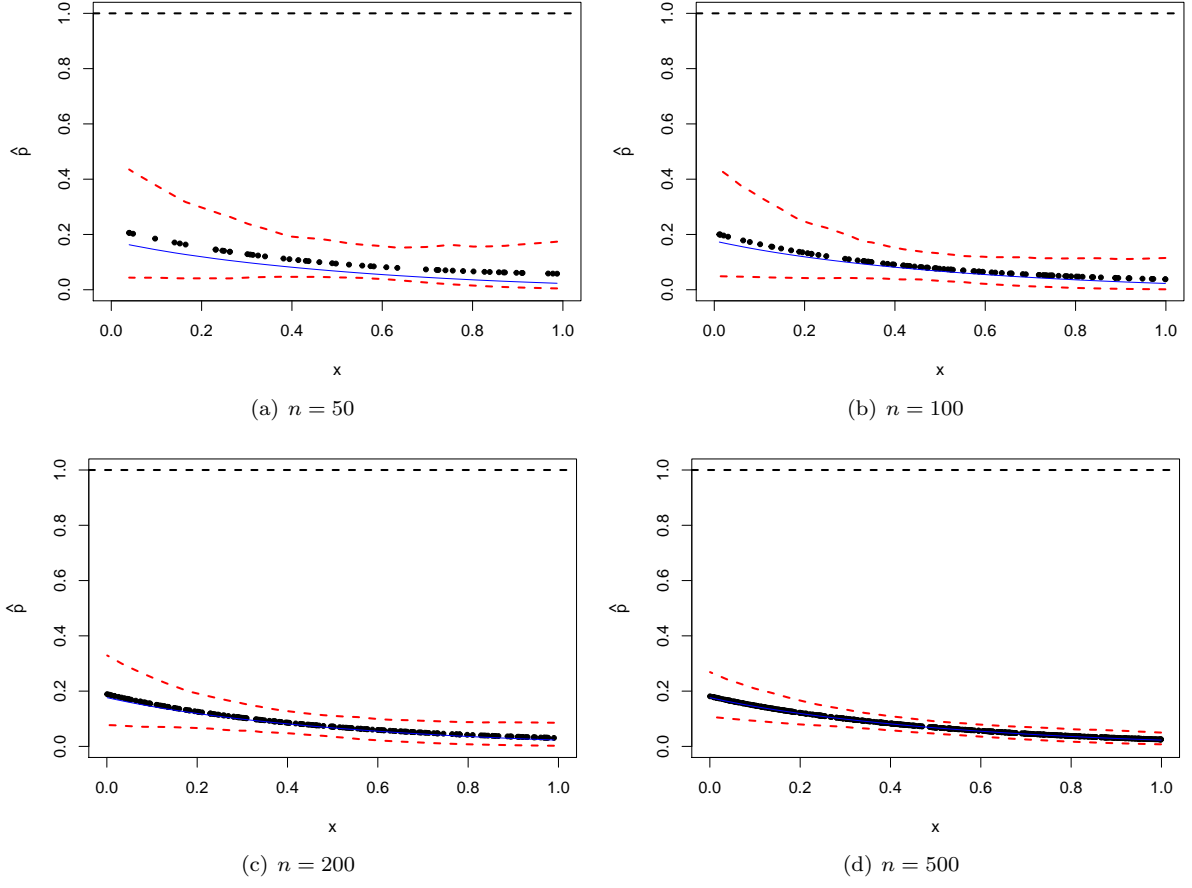

Figure 5: *Posterior* estimates for parameter  $p$  using zero-inflated artificial samples (Scenario 1).

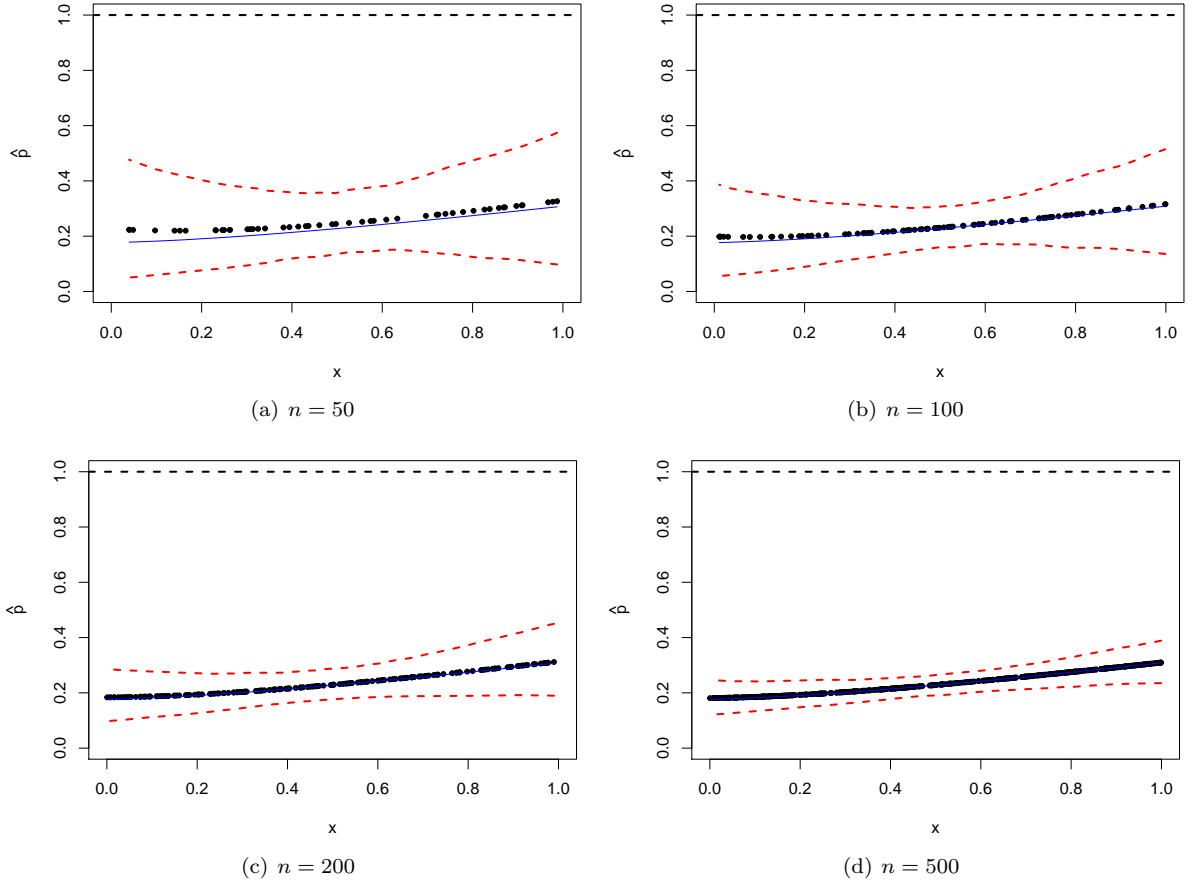

Figure 6: *Posterior* estimates for parameter  $p$  using zero-inflated artificial samples (Scenario 2).

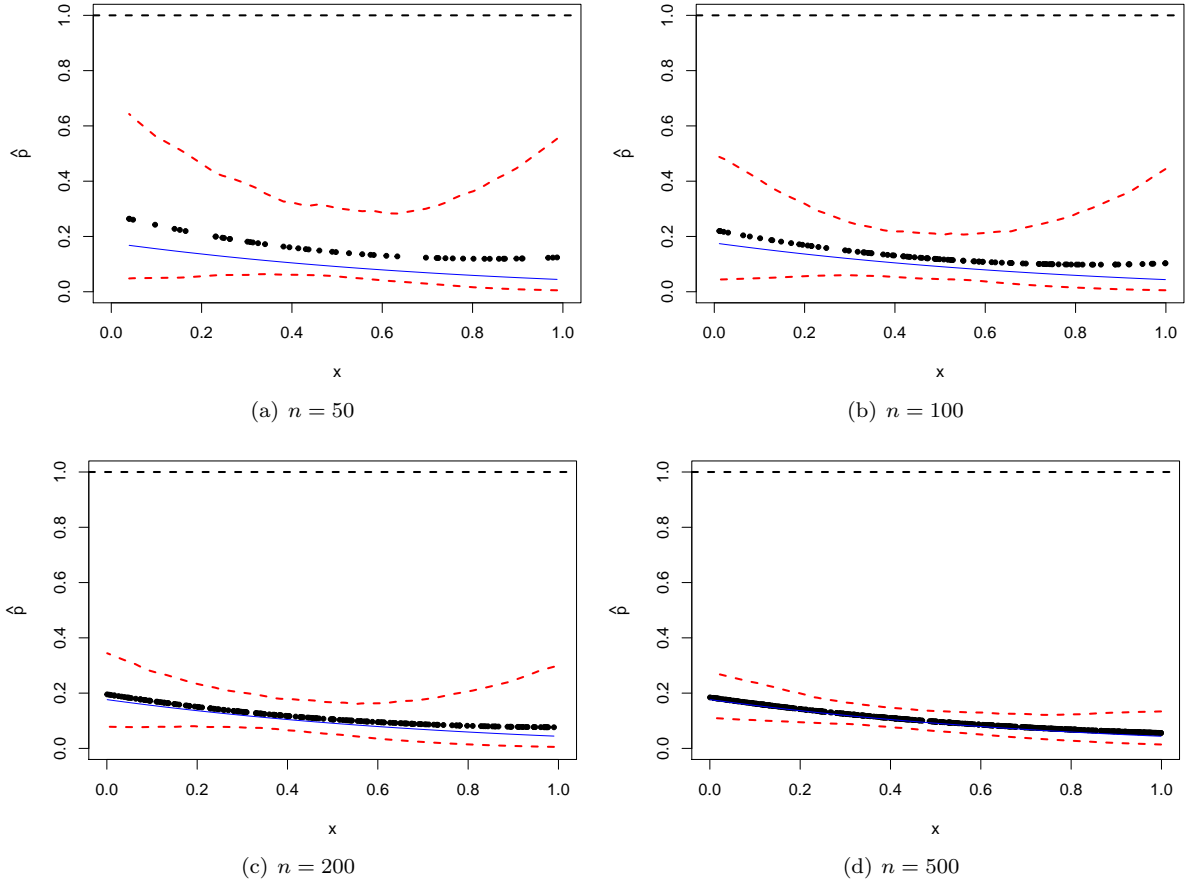

Figure 7: *Posterior* estimates for parameter  $p$  using zero-inflated artificial samples (Scenario 3).

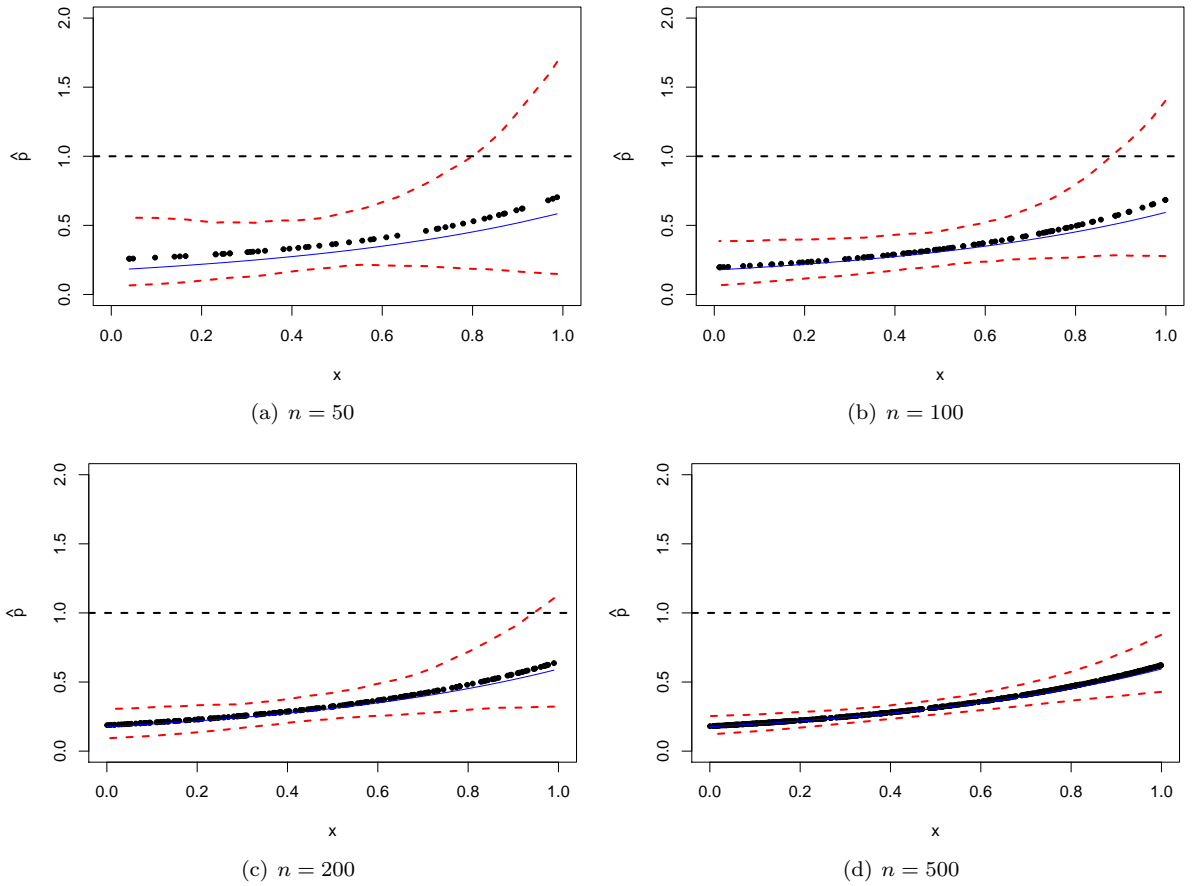

Figure 8: *Posterior* estimates for parameter  $p$  using zero-inflated artificial samples (Scenario 4).

### 1.3 Using *complementary log-log* link function

Table 13: Empirical properties of the Bayesian estimators using zero-inflated artificial samples (Scenarios 1 and 2).

| $n$        | Parameter    | Bias   | MSE   | $\sqrt{\frac{\text{MSE}}{\text{Var}}}$ | MAPE (%) |
|------------|--------------|--------|-------|----------------------------------------|----------|
| Scenario 1 |              |        |       |                                        |          |
| 50         | $\beta_{10}$ | -0.145 | 0.290 | 1.038                                  | 27.436   |
|            | $\beta_{11}$ | -0.369 | 1.254 | 1.059                                  | 26.086   |
|            | $\beta_{20}$ | 0.028  | 0.260 | 1.002                                  | 40.885   |
|            | $\beta_{21}$ | 0.222  | 0.816 | 1.032                                  | 72.841   |
| 100        | $\beta_{10}$ | -0.090 | 0.132 | 1.032                                  | 19.110   |
|            | $\beta_{11}$ | -0.148 | 0.415 | 1.028                                  | 16.902   |
|            | $\beta_{20}$ | 0.015  | 0.183 | 1.001                                  | 35.014   |
|            | $\beta_{21}$ | 0.122  | 0.604 | 1.012                                  | 61.264   |
| 200        | $\beta_{10}$ | -0.022 | 0.047 | 1.005                                  | 11.434   |
|            | $\beta_{11}$ | -0.107 | 0.185 | 1.032                                  | 11.402   |
|            | $\beta_{20}$ | 0.018  | 0.074 | 1.002                                  | 21.593   |
|            | $\beta_{21}$ | 0.060  | 0.296 | 1.006                                  | 42.673   |
| 500        | $\beta_{10}$ | -0.011 | 0.018 | 1.003                                  | 7.083    |
|            | $\beta_{11}$ | -0.038 | 0.061 | 1.012                                  | 6.449    |
|            | $\beta_{20}$ | 0.005  | 0.031 | 1.000                                  | 13.982   |
|            | $\beta_{21}$ | 0.025  | 0.116 | 1.003                                  | 26.966   |
| Scenario 2 |              |        |       |                                        |          |
| 50         | $\beta_{10}$ | -0.116 | 0.164 | 1.044                                  | 20.395   |
|            | $\beta_{11}$ | -0.179 | 0.375 | 1.046                                  | 15.972   |
|            | $\beta_{20}$ | 0.098  | 0.243 | 1.020                                  | 39.207   |
|            | $\beta_{21}$ | -0.083 | 0.657 | 1.005                                  | 127.997  |
| 100        | $\beta_{10}$ | -0.060 | 0.074 | 1.026                                  | 14.508   |
|            | $\beta_{11}$ | -0.106 | 0.192 | 1.030                                  | 11.570   |
|            | $\beta_{20}$ | 0.039  | 0.129 | 1.006                                  | 28.591   |
|            | $\beta_{21}$ | -0.018 | 0.357 | 1.000                                  | 96.053   |
| 200        | $\beta_{10}$ | -0.052 | 0.034 | 1.042                                  | 9.499    |
|            | $\beta_{11}$ | -0.015 | 0.082 | 1.001                                  | 7.587    |
|            | $\beta_{20}$ | 0.022  | 0.054 | 1.004                                  | 18.028   |
|            | $\beta_{21}$ | -0.021 | 0.154 | 1.001                                  | 61.469   |
| 500        | $\beta_{10}$ | -0.017 | 0.012 | 1.012                                  | 5.755    |
|            | $\beta_{11}$ | -0.004 | 0.028 | 1.000                                  | 4.473    |
|            | $\beta_{20}$ | 0.006  | 0.023 | 1.001                                  | 12.253   |
|            | $\beta_{21}$ | 0.000  | 0.062 | 1.000                                  | 40.099   |



Table 14: Empirical properties of the Bayesian estimators using zero-inflated artificial samples (Scenarios 3 and 4).

| $n$        | Parameter    | Bias   | MSE   | $\sqrt{\frac{\text{MSE}}{\text{Var}}}$ | MAPE (%) |
|------------|--------------|--------|-------|----------------------------------------|----------|
| Scenario 3 |              |        |       |                                        |          |
| 50         | $\beta_{10}$ | -0.286 | 0.547 | 1.085                                  | 36.060   |
|            | $\beta_{11}$ | 0.242  | 1.647 | 1.018                                  | 67.210   |
|            | $\beta_{20}$ | 0.026  | 0.281 | 1.001                                  | 41.631   |
|            | $\beta_{21}$ | 0.248  | 0.961 | 1.034                                  | 78.137   |
| 100        | $\beta_{10}$ | -0.108 | 0.245 | 1.025                                  | 24.112   |
|            | $\beta_{11}$ | -0.014 | 0.921 | 1.000                                  | 49.679   |
|            | $\beta_{20}$ | 0.010  | 0.174 | 1.000                                  | 33.560   |
|            | $\beta_{21}$ | 0.120  | 0.569 | 1.013                                  | 60.454   |
| 200        | $\beta_{10}$ | -0.055 | 0.083 | 1.019                                  | 14.855   |
|            | $\beta_{11}$ | -0.023 | 0.442 | 1.001                                  | 34.941   |
|            | $\beta_{20}$ | 0.012  | 0.072 | 1.001                                  | 21.081   |
|            | $\beta_{21}$ | 0.036  | 0.278 | 1.002                                  | 41.432   |
| 500        | $\beta_{10}$ | -0.024 | 0.033 | 1.008                                  | 9.631    |
|            | $\beta_{11}$ | -0.024 | 0.166 | 1.002                                  | 21.483   |
|            | $\beta_{20}$ | 0.002  | 0.032 | 1.000                                  | 14.379   |
|            | $\beta_{21}$ | 0.014  | 0.110 | 1.001                                  | 26.533   |
| Scenario 4 |              |        |       |                                        |          |
| 50         | $\beta_{10}$ | -0.232 | 0.352 | 1.087                                  | 29.729   |
|            | $\beta_{11}$ | 0.165  | 0.972 | 1.014                                  | 52.225   |
|            | $\beta_{20}$ | 0.048  | 0.209 | 1.006                                  | 37.053   |
|            | $\beta_{21}$ | -0.007 | 0.550 | 1.000                                  | 117.533  |
| 100        | $\beta_{10}$ | -0.116 | 0.147 | 1.049                                  | 20.012   |
|            | $\beta_{11}$ | 0.078  | 0.434 | 1.007                                  | 34.804   |
|            | $\beta_{20}$ | 0.037  | 0.125 | 1.006                                  | 28.175   |
|            | $\beta_{21}$ | -0.017 | 0.331 | 1.000                                  | 92.817   |
| 200        | $\beta_{10}$ | -0.043 | 0.066 | 1.014                                  | 13.459   |
|            | $\beta_{11}$ | 0.017  | 0.265 | 1.000                                  | 26.876   |
|            | $\beta_{20}$ | 0.029  | 0.054 | 1.008                                  | 18.318   |
|            | $\beta_{21}$ | -0.031 | 0.174 | 1.003                                  | 65.728   |
| 500        | $\beta_{10}$ | -0.006 | 0.022 | 1.001                                  | 7.707    |
|            | $\beta_{11}$ | -0.015 | 0.078 | 1.001                                  | 14.695   |
|            | $\beta_{20}$ | 0.005  | 0.022 | 1.001                                  | 11.691   |
|            | $\beta_{21}$ | -0.012 | 0.059 | 1.001                                  | 38.117   |

Table 15: *Posterior* estimates for model parameters using zero-inflated artificial samples (Scenarios 1 and 2).

| $n$        | Parameter    | Mean   | Median | Std. Dev. | 95% HPDI |        |
|------------|--------------|--------|--------|-----------|----------|--------|
|            |              |        |        |           | Lower    | Upper  |
| Scenario 1 |              |        |        |           |          |        |
| 50         | $\beta_{10}$ | 1.355  | 1.355  | 0.519     | 0.438    | 2.270  |
|            | $\beta_{11}$ | 2.631  | 2.620  | 1.057     | 1.022    | 4.252  |
|            | $\beta_{20}$ | -0.972 | -0.945 | 0.510     | -2.072   | 0.088  |
|            | $\beta_{21}$ | -0.778 | -0.768 | 0.876     | -2.783   | 1.212  |
| 100        | $\beta_{10}$ | 1.410  | 1.411  | 0.352     | 0.740    | 2.079  |
|            | $\beta_{11}$ | 2.852  | 2.844  | 0.627     | 1.679    | 4.037  |
|            | $\beta_{20}$ | -0.985 | -0.969 | 0.427     | -1.837   | -0.159 |
|            | $\beta_{21}$ | -0.878 | -0.877 | 0.767     | -2.449   | 0.681  |
| 200        | $\beta_{10}$ | 1.478  | 1.478  | 0.216     | 1.073    | 1.886  |
|            | $\beta_{11}$ | 2.893  | 2.889  | 0.417     | 2.131    | 3.662  |
|            | $\beta_{20}$ | -0.982 | -0.975 | 0.271     | -1.518   | -0.454 |
|            | $\beta_{21}$ | -0.940 | -0.935 | 0.541     | -2.034   | 0.147  |
| 500        | $\beta_{10}$ | 1.489  | 1.489  | 0.135     | 1.226    | 1.752  |
|            | $\beta_{11}$ | 2.962  | 2.961  | 0.243     | 2.500    | 3.423  |
|            | $\beta_{20}$ | -0.995 | -0.992 | 0.176     | -1.348   | -0.648 |
|            | $\beta_{21}$ | -0.975 | -0.974 | 0.339     | -1.645   | -0.307 |
| Scenario 2 |              |        |        |           |          |        |
| 50         | $\beta_{10}$ | 1.384  | 1.384  | 0.388     | 0.688    | 2.080  |
|            | $\beta_{11}$ | 2.821  | 2.817  | 0.586     | 1.763    | 3.881  |
|            | $\beta_{20}$ | -0.902 | -0.882 | 0.484     | -1.844   | 0.004  |
|            | $\beta_{21}$ | 0.417  | 0.414  | 0.806     | -1.104   | 1.944  |
| 100        | $\beta_{10}$ | 1.440  | 1.440  | 0.265     | 0.917    | 1.964  |
|            | $\beta_{11}$ | 2.894  | 2.892  | 0.425     | 2.079    | 3.714  |
|            | $\beta_{20}$ | -0.961 | -0.950 | 0.357     | -1.685   | -0.253 |
|            | $\beta_{21}$ | 0.482  | 0.478  | 0.597     | -0.709   | 1.674  |
| 200        | $\beta_{10}$ | 1.448  | 1.448  | 0.176     | 1.109    | 1.786  |
|            | $\beta_{11}$ | 2.985  | 2.983  | 0.286     | 2.434    | 3.537  |
|            | $\beta_{20}$ | -0.978 | -0.973 | 0.232     | -1.441   | -0.523 |
|            | $\beta_{21}$ | 0.479  | 0.480  | 0.392     | -0.329   | 1.286  |
| 500        | $\beta_{10}$ | 1.483  | 1.483  | 0.108     | 1.263    | 1.704  |
|            | $\beta_{11}$ | 2.996  | 2.995  | 0.167     | 2.660    | 3.333  |
|            | $\beta_{20}$ | -0.994 | -0.991 | 0.152     | -1.297   | -0.694 |
|            | $\beta_{21}$ | 0.500  | 0.499  | 0.248     | 0.009    | 0.994  |

Table 16: *Posterior* estimates for model parameters using zero-inflated artificial samples (Scenarios 3 and 4).

| $n$        | Parameter    | Mean   | Median | Std. Dev. | 95% HPDI |        |
|------------|--------------|--------|--------|-----------|----------|--------|
|            |              |        |        |           | Lower    | Upper  |
| Scenario 3 |              |        |        |           |          |        |
| 50         | $\beta_{10}$ | 1.214  | 1.223  | 0.682     | -0.069   | 2.474  |
|            | $\beta_{11}$ | -1.258 | -1.248 | 1.260     | -3.918   | 1.391  |
|            | $\beta_{20}$ | -0.974 | -0.949 | 0.530     | -2.073   | 0.081  |
|            | $\beta_{21}$ | -0.752 | -0.743 | 0.949     | -2.749   | 1.224  |
| 100        | $\beta_{10}$ | 1.392  | 1.398  | 0.483     | 0.477    | 2.293  |
|            | $\beta_{11}$ | -1.514 | -1.510 | 0.960     | -3.446   | 0.395  |
|            | $\beta_{20}$ | -0.990 | -0.974 | 0.418     | -1.845   | -0.162 |
|            | $\beta_{21}$ | -0.880 | -0.878 | 0.745     | -2.450   | 0.691  |
| 200        | $\beta_{10}$ | 1.445  | 1.447  | 0.283     | 0.903    | 1.986  |
|            | $\beta_{11}$ | -1.523 | -1.518 | 0.664     | -2.827   | -0.225 |
|            | $\beta_{20}$ | -0.988 | -0.981 | 0.268     | -1.530   | -0.457 |
|            | $\beta_{21}$ | -0.964 | -0.959 | 0.526     | -2.069   | 0.134  |
| 500        | $\beta_{10}$ | 1.476  | 1.478  | 0.180     | 1.129    | 1.821  |
|            | $\beta_{11}$ | -1.524 | -1.522 | 0.407     | -2.307   | -0.745 |
|            | $\beta_{20}$ | -0.998 | -0.995 | 0.180     | -1.350   | -0.648 |
|            | $\beta_{21}$ | -0.986 | -0.985 | 0.331     | -1.659   | -0.315 |
| Scenario 4 |              |        |        |           |          |        |
| 50         | $\beta_{10}$ | 1.268  | 1.275  | 0.546     | 0.231    | 2.295  |
|            | $\beta_{11}$ | -1.335 | -1.330 | 0.972     | -3.202   | 0.524  |
|            | $\beta_{20}$ | -0.952 | -0.933 | 0.455     | -1.901   | -0.037 |
|            | $\beta_{21}$ | 0.493  | 0.490  | 0.742     | -1.036   | 2.025  |
| 100        | $\beta_{10}$ | 1.384  | 1.389  | 0.365     | 0.624    | 2.141  |
|            | $\beta_{11}$ | -1.422 | -1.421 | 0.654     | -2.805   | -0.033 |
|            | $\beta_{20}$ | -0.963 | -0.951 | 0.352     | -1.690   | -0.256 |
|            | $\beta_{21}$ | 0.483  | 0.480  | 0.575     | -0.706   | 1.677  |
| 200        | $\beta_{10}$ | 1.457  | 1.458  | 0.254     | 0.990    | 1.921  |
|            | $\beta_{11}$ | -1.483 | -1.482 | 0.515     | -2.415   | -0.551 |
|            | $\beta_{20}$ | -0.971 | -0.967 | 0.231     | -1.433   | -0.517 |
|            | $\beta_{21}$ | 0.469  | 0.469  | 0.416     | -0.337   | 1.275  |
| 500        | $\beta_{10}$ | 1.494  | 1.494  | 0.146     | 1.193    | 1.792  |
|            | $\beta_{11}$ | -1.515 | -1.514 | 0.278     | -2.074   | -0.957 |
|            | $\beta_{20}$ | -0.995 | -0.993 | 0.146     | -1.299   | -0.694 |
|            | $\beta_{21}$ | 0.488  | 0.488  | 0.242     | -0.004   | 0.983  |

Table 17: Coverage probabilities (%) of the HPDIs using zero-inflated artificial samples (Scenarios 1 and 2).

| $n$ | Parameter    | BNCP       | CP    | ANCP | BNCP       | CP    | ANCP |
|-----|--------------|------------|-------|------|------------|-------|------|
|     |              | Scenario 1 |       |      | Scenario 2 |       |      |
| 50  | $\beta_{10}$ | 1.60       | 92.40 | 6.00 | 2.00       | 91.80 | 6.20 |
|     | $\beta_{11}$ | 2.00       | 89.40 | 8.60 | 1.80       | 91.20 | 7.00 |
|     | $\beta_{20}$ | 4.60       | 95.20 | 0.20 | 6.40       | 92.60 | 1.00 |
|     | $\beta_{21}$ | 1.80       | 97.80 | 0.40 | 2.20       | 94.40 | 3.40 |
| 100 | $\beta_{10}$ | 1.40       | 94.60 | 4.00 | 2.60       | 94.60 | 2.80 |
|     | $\beta_{11}$ | 0.40       | 94.00 | 5.60 | 0.80       | 93.40 | 5.80 |
|     | $\beta_{20}$ | 4.80       | 94.80 | 0.40 | 3.40       | 95.00 | 1.60 |
|     | $\beta_{21}$ | 3.40       | 95.40 | 1.20 | 1.40       | 95.00 | 3.60 |
| 200 | $\beta_{10}$ | 2.20       | 94.00 | 3.80 | 1.40       | 94.80 | 3.80 |
|     | $\beta_{11}$ | 1.60       | 93.40 | 5.00 | 1.80       | 94.80 | 3.40 |
|     | $\beta_{20}$ | 4.60       | 94.40 | 1.00 | 4.40       | 94.40 | 1.20 |
|     | $\beta_{21}$ | 2.60       | 96.00 | 1.40 | 1.40       | 95.60 | 3.00 |
| 500 | $\beta_{10}$ | 1.80       | 95.00 | 3.20 | 1.00       | 96.60 | 2.40 |
|     | $\beta_{11}$ | 2.00       | 93.40 | 4.60 | 1.40       | 96.80 | 1.80 |
|     | $\beta_{20}$ | 2.80       | 95.20 | 2.00 | 2.20       | 96.80 | 1.00 |
|     | $\beta_{21}$ | 2.80       | 95.20 | 2.00 | 2.20       | 95.20 | 2.60 |

Table 18: Coverage probabilities (%) of the HPDIs using zero-inflated artificial samples (Scenarios 3 and 4).

| $n$ | Parameter    | BNCP       | CP    | ANCP | BNCP       | CP    | ANCP |
|-----|--------------|------------|-------|------|------------|-------|------|
|     |              | Scenario 3 |       |      | Scenario 4 |       |      |
| 50  | $\beta_{10}$ | 1.40       | 93.80 | 4.80 | 0.60       | 95.60 | 3.80 |
|     | $\beta_{11}$ | 2.20       | 97.00 | 0.80 | 3.40       | 95.60 | 1.00 |
|     | $\beta_{20}$ | 2.20       | 96.80 | 1.00 | 4.00       | 95.80 | 0.20 |
|     | $\beta_{21}$ | 3.60       | 96.40 | 0.00 | 1.60       | 96.20 | 2.20 |
| 100 | $\beta_{10}$ | 1.40       | 95.60 | 3.00 | 1.20       | 96.60 | 2.20 |
|     | $\beta_{11}$ | 2.60       | 95.80 | 1.60 | 2.00       | 96.00 | 2.00 |
|     | $\beta_{20}$ | 4.20       | 95.00 | 0.80 | 3.60       | 95.40 | 1.00 |
|     | $\beta_{21}$ | 1.80       | 97.40 | 0.80 | 1.00       | 97.00 | 2.00 |
| 200 | $\beta_{10}$ | 2.40       | 95.20 | 2.40 | 1.80       | 94.00 | 4.20 |
|     | $\beta_{11}$ | 1.80       | 96.20 | 2.00 | 3.40       | 93.40 | 3.20 |
|     | $\beta_{20}$ | 2.60       | 95.80 | 1.60 | 2.60       | 96.20 | 1.20 |
|     | $\beta_{21}$ | 2.80       | 96.20 | 1.00 | 2.40       | 94.60 | 3.00 |
| 500 | $\beta_{10}$ | 2.20       | 94.40 | 3.40 | 3.00       | 94.80 | 2.20 |
|     | $\beta_{11}$ | 2.00       | 95.20 | 2.80 | 1.40       | 95.40 | 3.20 |
|     | $\beta_{20}$ | 3.40       | 94.80 | 1.80 | 2.80       | 96.20 | 1.00 |
|     | $\beta_{21}$ | 1.60       | 96.60 | 1.80 | 1.80       | 95.40 | 2.80 |

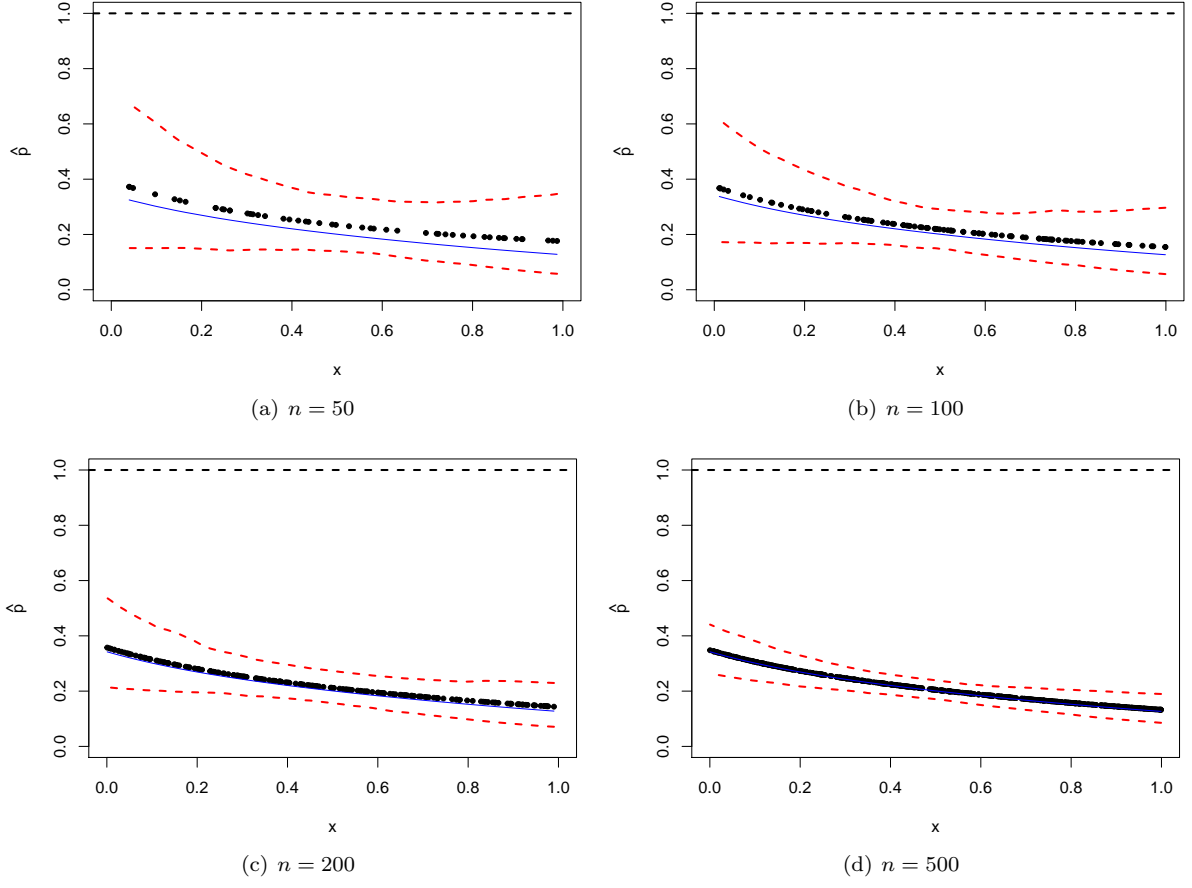

Figure 9: *Posterior* estimates for parameter  $p$  using zero-inflated artificial samples (Scenario 1).

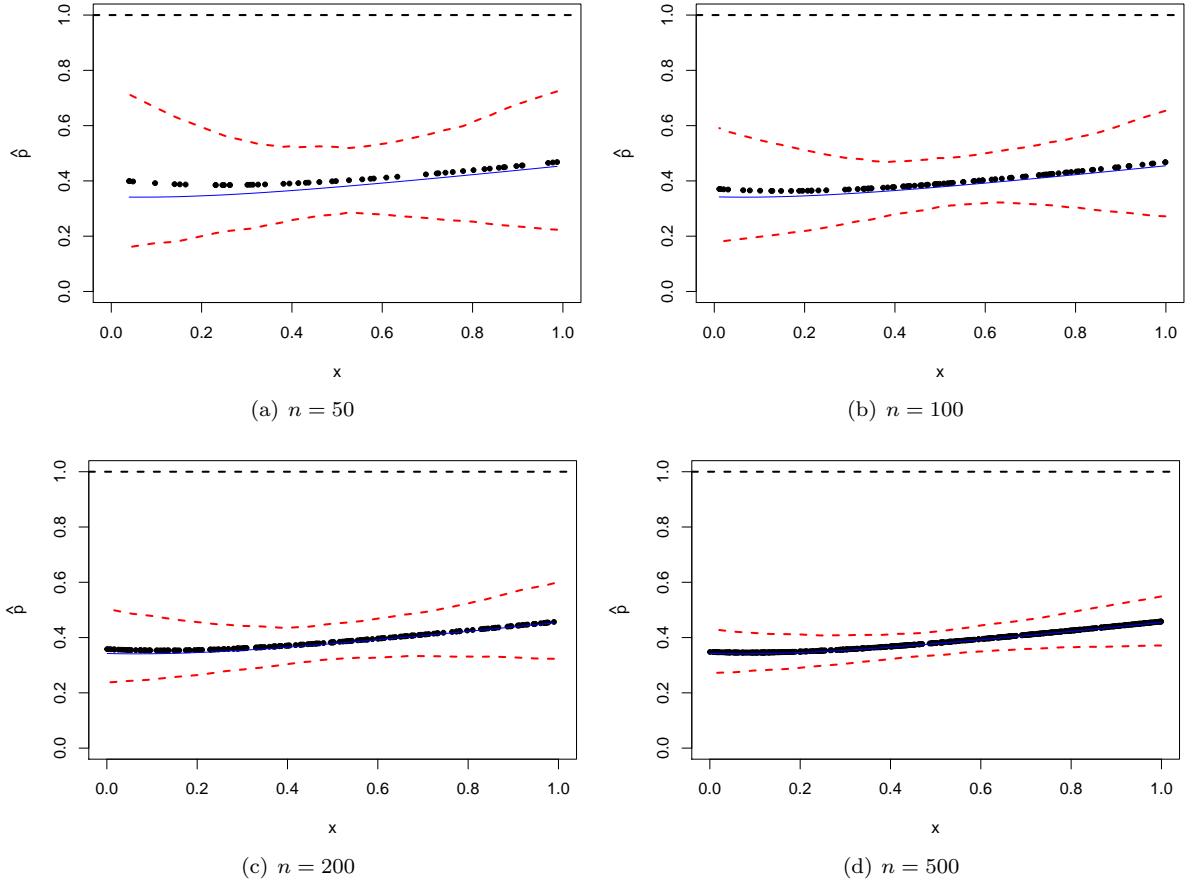

Figure 10: *Posterior* estimates for parameter  $p$  using zero-inflated artificial samples (Scenario 2).

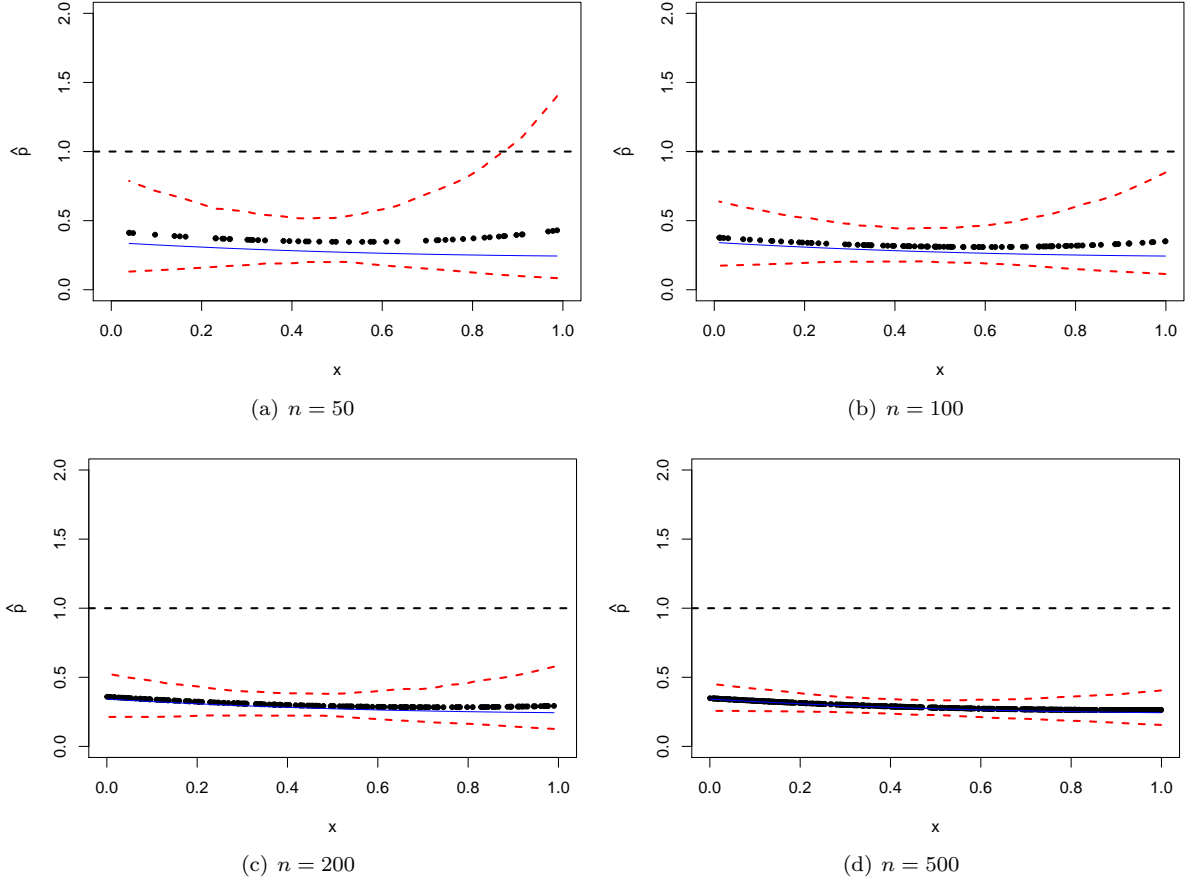

Figure 11: *Posterior* estimates for parameter  $p$  using zero-inflated artificial samples (Scenario 3).

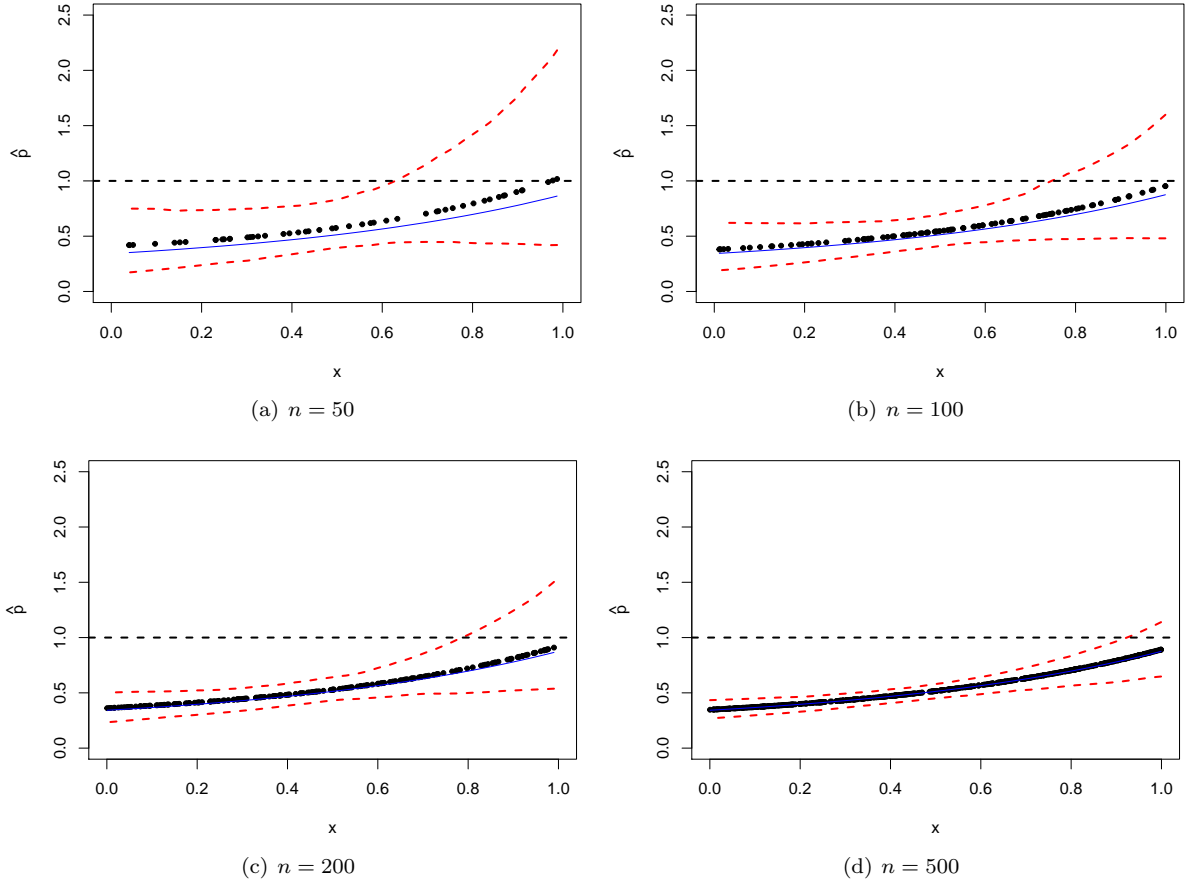

Figure 12: *Posterior* estimates for parameter  $p$  using zero-inflated artificial samples (Scenario 4).

## 2 Zero-deflated artificial data

### 2.1 Using *logit* link function

Table 19: Empirical properties of the Bayesian estimators using zero-deflated artificial samples (Scenarios 1 and 2).

| $n$        | Parameter    | Bias   | MSE   | $\sqrt{\frac{\text{MSE}}{\text{Var}}}$ | MAPE (%) |
|------------|--------------|--------|-------|----------------------------------------|----------|
| Scenario 1 |              |        |       |                                        |          |
| 50         | $\beta_{10}$ | 0.116  | 0.342 | 1.020                                  | 46.269   |
|            | $\beta_{11}$ | -0.209 | 0.905 | 1.025                                  | 75.544   |
|            | $\beta_{20}$ | -0.071 | 0.298 | 1.008                                  | 85.289   |
|            | $\beta_{21}$ | -0.017 | 0.904 | 1.000                                  | 148.588  |
| 100        | $\beta_{10}$ | 0.040  | 0.221 | 1.004                                  | 36.505   |
|            | $\beta_{11}$ | -0.069 | 0.581 | 1.004                                  | 60.373   |
|            | $\beta_{20}$ | -0.010 | 0.189 | 1.000                                  | 68.498   |
|            | $\beta_{21}$ | -0.061 | 0.566 | 1.003                                  | 118.380  |
| 200        | $\beta_{10}$ | 0.043  | 0.093 | 1.010                                  | 25.193   |
|            | $\beta_{11}$ | -0.067 | 0.268 | 1.008                                  | 41.512   |
|            | $\beta_{20}$ | -0.016 | 0.079 | 1.002                                  | 44.834   |
|            | $\beta_{21}$ | -0.005 | 0.277 | 1.000                                  | 85.763   |
| 500        | $\beta_{10}$ | -0.004 | 0.041 | 1.000                                  | 16.515   |
|            | $\beta_{11}$ | 0.004  | 0.105 | 1.000                                  | 25.966   |
|            | $\beta_{20}$ | 0.005  | 0.035 | 1.000                                  | 30.158   |
|            | $\beta_{21}$ | -0.022 | 0.107 | 1.002                                  | 52.544   |
| Scenario 2 |              |        |       |                                        |          |
| 50         | $\beta_{10}$ | 0.070  | 0.329 | 1.007                                  | 44.744   |
|            | $\beta_{11}$ | -0.121 | 0.928 | 1.008                                  | 75.648   |
|            | $\beta_{20}$ | -0.188 | 0.383 | 1.050                                  | 33.581   |
|            | $\beta_{21}$ | 0.144  | 0.939 | 1.011                                  | 78.153   |
| 100        | $\beta_{10}$ | 0.040  | 0.185 | 1.004                                  | 33.702   |
|            | $\beta_{11}$ | -0.075 | 0.508 | 1.006                                  | 56.059   |
|            | $\beta_{20}$ | -0.069 | 0.251 | 1.010                                  | 27.134   |
|            | $\beta_{21}$ | 0.028  | 0.648 | 1.001                                  | 64.126   |
| 200        | $\beta_{10}$ | 0.004  | 0.082 | 1.000                                  | 22.578   |
|            | $\beta_{11}$ | -0.007 | 0.269 | 1.000                                  | 41.316   |
|            | $\beta_{20}$ | -0.066 | 0.099 | 1.023                                  | 16.943   |
|            | $\beta_{21}$ | 0.074  | 0.297 | 1.010                                  | 43.689   |
| 500        | $\beta_{10}$ | 0.013  | 0.038 | 1.002                                  | 15.487   |
|            | $\beta_{11}$ | -0.021 | 0.100 | 1.002                                  | 25.244   |
|            | $\beta_{20}$ | -0.022 | 0.045 | 1.006                                  | 11.579   |
|            | $\beta_{21}$ | 0.018  | 0.121 | 1.001                                  | 27.868   |

Table 20: Empirical properties of the Bayesian estimators using zero-deflated artificial samples (Scenarios 3 and 4).

| $n$        | Parameter    | Bias   | MSE   | $\sqrt{\frac{\text{MSE}}{\text{Var}}}$ | MAPE (%) |
|------------|--------------|--------|-------|----------------------------------------|----------|
| Scenario 3 |              |        |       |                                        |          |
| 50         | $\beta_{10}$ | 0.007  | 0.416 | 1.000                                  | 51.077   |
|            | $\beta_{11}$ | 0.578  | 1.484 | 1.136                                  | 63.871   |
|            | $\beta_{20}$ | -0.046 | 0.298 | 1.004                                  | 88.854   |
|            | $\beta_{21}$ | -0.032 | 0.908 | 1.000                                  | 156.233  |
| 100        | $\beta_{10}$ | 0.004  | 0.320 | 1.000                                  | 45.682   |
|            | $\beta_{11}$ | 0.249  | 1.085 | 1.030                                  | 55.080   |
|            | $\beta_{20}$ | -0.039 | 0.198 | 1.004                                  | 70.640   |
|            | $\beta_{21}$ | -0.012 | 0.563 | 1.000                                  | 120.764  |
| 200        | $\beta_{10}$ | 0.001  | 0.155 | 1.000                                  | 31.560   |
|            | $\beta_{11}$ | 0.142  | 0.607 | 1.017                                  | 41.578   |
|            | $\beta_{20}$ | -0.023 | 0.080 | 1.003                                  | 45.237   |
|            | $\beta_{21}$ | -0.004 | 0.265 | 1.000                                  | 81.871   |
| 500        | $\beta_{10}$ | -0.006 | 0.064 | 1.000                                  | 20.189   |
|            | $\beta_{11}$ | 0.077  | 0.237 | 1.013                                  | 25.468   |
|            | $\beta_{20}$ | -0.002 | 0.033 | 1.000                                  | 28.544   |
|            | $\beta_{21}$ | -0.009 | 0.098 | 1.000                                  | 49.648   |
| Scenario 4 |              |        |       |                                        |          |
| 50         | $\beta_{10}$ | -0.009 | 0.356 | 1.000                                  | 47.455   |
|            | $\beta_{11}$ | 0.562  | 1.376 | 1.139                                  | 62.652   |
|            | $\beta_{20}$ | -0.126 | 0.372 | 1.022                                  | 32.045   |
|            | $\beta_{21}$ | 0.058  | 1.017 | 1.002                                  | 80.557   |
| 100        | $\beta_{10}$ | -0.053 | 0.294 | 1.005                                  | 42.976   |
|            | $\beta_{11}$ | 0.366  | 1.155 | 1.064                                  | 56.965   |
|            | $\beta_{20}$ | -0.103 | 0.239 | 1.023                                  | 26.300   |
|            | $\beta_{21}$ | 0.113  | 0.650 | 1.010                                  | 65.186   |
| 200        | $\beta_{10}$ | 0.012  | 0.113 | 1.001                                  | 27.492   |
|            | $\beta_{11}$ | 0.154  | 0.530 | 1.023                                  | 39.172   |
|            | $\beta_{20}$ | -0.059 | 0.108 | 1.016                                  | 17.372   |
|            | $\beta_{21}$ | 0.070  | 0.335 | 1.007                                  | 46.286   |
| 500        | $\beta_{10}$ | -0.013 | 0.052 | 1.002                                  | 17.895   |
|            | $\beta_{11}$ | 0.086  | 0.207 | 1.018                                  | 24.165   |
|            | $\beta_{20}$ | -0.013 | 0.045 | 1.002                                  | 11.191   |
|            | $\beta_{21}$ | 0.017  | 0.122 | 1.001                                  | 27.718   |



Table 21: *Posterior* estimates for model parameters using zero-deflated artificial samples (Scenarios 1 and 2).

| $n$        | Parameter    | Mean   | Median | Std. Dev. | 95% HPDI |        |
|------------|--------------|--------|--------|-----------|----------|--------|
|            |              |        |        |           | Lower    | Upper  |
| Scenario 1 |              |        |        |           |          |        |
| 50         | $\beta_{10}$ | -0.884 | -0.871 | 0.574     | -2.129   | 0.336  |
|            | $\beta_{11}$ | 0.791  | 0.787  | 0.928     | -1.156   | 2.737  |
|            | $\beta_{20}$ | 0.429  | 0.423  | 0.541     | -0.722   | 1.591  |
|            | $\beta_{21}$ | 0.483  | 0.478  | 0.951     | -1.517   | 2.486  |
| 100        | $\beta_{10}$ | -0.960 | -0.952 | 0.469     | -1.917   | -0.013 |
|            | $\beta_{11}$ | 0.931  | 0.928  | 0.759     | -0.590   | 2.455  |
|            | $\beta_{20}$ | 0.490  | 0.485  | 0.435     | -0.399   | 1.387  |
|            | $\beta_{21}$ | 0.439  | 0.437  | 0.750     | -1.119   | 1.995  |
| 200        | $\beta_{10}$ | -0.957 | -0.953 | 0.301     | -1.568   | -0.351 |
|            | $\beta_{11}$ | 0.933  | 0.933  | 0.513     | -0.086   | 1.956  |
|            | $\beta_{20}$ | 0.484  | 0.482  | 0.280     | -0.078   | 1.051  |
|            | $\beta_{21}$ | 0.495  | 0.493  | 0.526     | -0.564   | 1.554  |
| 500        | $\beta_{10}$ | -1.004 | -1.003 | 0.203     | -1.408   | -0.602 |
|            | $\beta_{11}$ | 1.004  | 1.003  | 0.324     | 0.376    | 1.633  |
|            | $\beta_{20}$ | 0.505  | 0.503  | 0.187     | 0.137    | 0.874  |
|            | $\beta_{21}$ | 0.478  | 0.478  | 0.327     | -0.164   | 1.121  |
| Scenario 2 |              |        |        |           |          |        |
| 50         | $\beta_{10}$ | -0.930 | -0.917 | 0.569     | -2.095   | 0.212  |
|            | $\beta_{11}$ | 0.879  | 0.878  | 0.956     | -1.013   | 2.782  |
|            | $\beta_{20}$ | 1.312  | 1.294  | 0.589     | 0.063    | 2.598  |
|            | $\beta_{21}$ | -0.856 | -0.848 | 0.958     | -2.945   | 1.212  |
| 100        | $\beta_{10}$ | -0.960 | -0.953 | 0.429     | -1.852   | -0.080 |
|            | $\beta_{11}$ | 0.925  | 0.923  | 0.709     | -0.548   | 2.405  |
|            | $\beta_{20}$ | 1.431  | 1.420  | 0.496     | 0.445    | 2.442  |
|            | $\beta_{21}$ | -0.972 | -0.964 | 0.804     | -2.626   | 0.673  |
| 200        | $\beta_{10}$ | -0.996 | -0.993 | 0.287     | -1.564   | -0.431 |
|            | $\beta_{11}$ | 0.993  | 0.993  | 0.519     | -0.001   | 1.986  |
|            | $\beta_{20}$ | 1.434  | 1.428  | 0.308     | 0.800    | 2.077  |
|            | $\beta_{21}$ | -0.926 | -0.923 | 0.540     | -2.041   | 0.189  |
| 500        | $\beta_{10}$ | -0.987 | -0.986 | 0.194     | -1.359   | -0.618 |
|            | $\beta_{11}$ | 0.979  | 0.979  | 0.315     | 0.372    | 1.587  |
|            | $\beta_{20}$ | 1.478  | 1.475  | 0.211     | 1.058    | 1.902  |
|            | $\beta_{21}$ | -0.982 | -0.980 | 0.347     | -1.668   | -0.300 |

Table 22: *Posterior* estimates for model parameters using zero-deflated artificial samples (Scenarios 3 and 4).

| $n$        | Parameter    | Mean   | Median | Std. Dev. | 95% HPDI |        |
|------------|--------------|--------|--------|-----------|----------|--------|
|            |              |        |        |           | Lower    | Upper  |
| Scenario 3 |              |        |        |           |          |        |
| 50         | $\beta_{10}$ | -0.993 | -0.970 | 0.645     | -2.515   | 0.496  |
|            | $\beta_{11}$ | -0.922 | -0.910 | 1.073     | -3.654   | 1.794  |
|            | $\beta_{20}$ | 0.454  | 0.447  | 0.544     | -0.698   | 1.624  |
|            | $\beta_{21}$ | 0.468  | 0.463  | 0.952     | -1.546   | 2.478  |
| 100        | $\beta_{10}$ | -0.996 | -0.980 | 0.566     | -2.206   | 0.185  |
|            | $\beta_{11}$ | -1.251 | -1.244 | 1.012     | -3.489   | 0.970  |
|            | $\beta_{20}$ | 0.461  | 0.457  | 0.443     | -0.427   | 1.356  |
|            | $\beta_{21}$ | 0.488  | 0.486  | 0.750     | -1.067   | 2.045  |
| 200        | $\beta_{10}$ | -0.999 | -0.993 | 0.394     | -1.764   | -0.242 |
|            | $\beta_{11}$ | -1.359 | -1.349 | 0.766     | -2.936   | 0.204  |
|            | $\beta_{20}$ | 0.477  | 0.476  | 0.282     | -0.086   | 1.041  |
|            | $\beta_{21}$ | 0.496  | 0.494  | 0.515     | -0.555   | 1.557  |
| 500        | $\beta_{10}$ | -1.006 | -1.003 | 0.252     | -1.505   | -0.512 |
|            | $\beta_{11}$ | -1.423 | -1.419 | 0.480     | -2.388   | -0.466 |
|            | $\beta_{20}$ | 0.498  | 0.497  | 0.182     | 0.130    | 0.868  |
|            | $\beta_{21}$ | 0.491  | 0.491  | 0.312     | -0.152   | 1.134  |
| Scenario 4 |              |        |        |           |          |        |
| 50         | $\beta_{10}$ | -1.009 | -0.989 | 0.596     | -2.426   | 0.373  |
|            | $\beta_{11}$ | -0.938 | -0.921 | 1.030     | -3.628   | 1.734  |
|            | $\beta_{20}$ | 1.374  | 1.355  | 0.597     | 0.109    | 2.667  |
|            | $\beta_{21}$ | -0.942 | -0.934 | 1.007     | -3.039   | 1.143  |
| 100        | $\beta_{10}$ | -1.053 | -1.040 | 0.539     | -2.169   | 0.040  |
|            | $\beta_{11}$ | -1.134 | -1.127 | 1.011     | -3.277   | 1.003  |
|            | $\beta_{20}$ | 1.397  | 1.386  | 0.478     | 0.412    | 2.401  |
|            | $\beta_{21}$ | -0.887 | -0.880 | 0.798     | -2.538   | 0.761  |
| 200        | $\beta_{10}$ | -0.988 | -0.982 | 0.335     | -1.682   | -0.302 |
|            | $\beta_{11}$ | -1.346 | -1.335 | 0.711     | -2.861   | 0.154  |
|            | $\beta_{20}$ | 1.441  | 1.436  | 0.322     | 0.805    | 2.084  |
|            | $\beta_{21}$ | -0.930 | -0.928 | 0.574     | -2.045   | 0.189  |
| 500        | $\beta_{10}$ | -1.013 | -1.010 | 0.227     | -1.468   | -0.563 |
|            | $\beta_{11}$ | -1.414 | -1.410 | 0.447     | -2.350   | -0.485 |
|            | $\beta_{20}$ | 1.487  | 1.484  | 0.213     | 1.066    | 1.912  |
|            | $\beta_{21}$ | -0.983 | -0.981 | 0.348     | -1.670   | -0.299 |

Table 23: Coverage probabilities (%) of the HPDIs using zero-deflated artificial samples (Scenarios 1 and 2).

| $n$ | Parameter    | BNCP       | CP    | ANCP | BNCP       | CP    | ANCP |
|-----|--------------|------------|-------|------|------------|-------|------|
|     |              | Scenario 1 |       |      | Scenario 2 |       |      |
| 50  | $\beta_{10}$ | 3.40       | 96.20 | 0.40 | 4.40       | 94.40 | 1.20 |
|     | $\beta_{11}$ | 0.80       | 96.60 | 2.60 | 2.20       | 95.20 | 2.60 |
|     | $\beta_{20}$ | 0.40       | 97.00 | 2.60 | 0.20       | 95.60 | 4.20 |
|     | $\beta_{21}$ | 1.40       | 97.60 | 1.00 | 2.40       | 97.40 | 0.20 |
| 100 | $\beta_{10}$ | 3.80       | 94.60 | 1.60 | 2.20       | 96.80 | 1.00 |
|     | $\beta_{11}$ | 1.60       | 96.40 | 2.00 | 1.60       | 95.60 | 2.80 |
|     | $\beta_{20}$ | 1.60       | 96.00 | 2.40 | 0.80       | 95.20 | 4.00 |
|     | $\beta_{21}$ | 1.40       | 96.20 | 2.40 | 2.60       | 96.00 | 1.40 |
| 200 | $\beta_{10}$ | 3.40       | 96.20 | 0.40 | 3.00       | 95.00 | 2.00 |
|     | $\beta_{11}$ | 1.20       | 96.60 | 2.20 | 3.80       | 93.60 | 2.60 |
|     | $\beta_{20}$ | 0.80       | 96.00 | 3.20 | 0.80       | 96.00 | 3.20 |
|     | $\beta_{21}$ | 1.20       | 97.00 | 1.80 | 2.40       | 96.40 | 1.20 |
| 500 | $\beta_{10}$ | 2.20       | 95.00 | 2.80 | 2.60       | 95.20 | 2.20 |
|     | $\beta_{11}$ | 2.40       | 94.80 | 2.80 | 2.00       | 95.60 | 2.40 |
|     | $\beta_{20}$ | 0.80       | 95.80 | 3.40 | 1.40       | 95.20 | 3.40 |
|     | $\beta_{21}$ | 2.40       | 95.80 | 1.80 | 2.80       | 95.00 | 2.20 |

Table 24: Coverage probabilities (%) of the HPDIs using zero-deflated artificial samples (Scenarios 3 and 4).

| $n$ | Parameter    | BNCP       | CP    | ANCP | BNCP       | CP    | ANCP |
|-----|--------------|------------|-------|------|------------|-------|------|
|     |              | Scenario 3 |       |      | Scenario 4 |       |      |
| 50  | $\beta_{10}$ | 2.20       | 97.60 | 0.20 | 1.40       | 98.60 | 0.00 |
|     | $\beta_{11}$ | 3.20       | 96.80 | 0.00 | 2.60       | 97.40 | 0.00 |
|     | $\beta_{20}$ | 0.40       | 97.60 | 2.00 | 1.00       | 96.00 | 3.00 |
|     | $\beta_{21}$ | 0.80       | 97.60 | 1.60 | 2.00       | 96.60 | 1.40 |
| 100 | $\beta_{10}$ | 2.40       | 97.00 | 0.60 | 1.20       | 97.60 | 1.20 |
|     | $\beta_{11}$ | 1.80       | 97.60 | 0.60 | 3.40       | 96.40 | 0.20 |
|     | $\beta_{20}$ | 2.00       | 95.00 | 3.00 | 0.80       | 94.60 | 4.60 |
|     | $\beta_{21}$ | 1.60       | 96.40 | 2.00 | 2.80       | 96.20 | 1.00 |
| 200 | $\beta_{10}$ | 3.40       | 94.40 | 2.20 | 3.40       | 95.80 | 0.80 |
|     | $\beta_{11}$ | 4.00       | 95.20 | 0.80 | 2.80       | 96.20 | 1.00 |
|     | $\beta_{20}$ | 2.20       | 95.60 | 2.20 | 2.00       | 94.80 | 3.20 |
|     | $\beta_{21}$ | 1.20       | 96.80 | 2.00 | 3.60       | 94.40 | 2.00 |
| 500 | $\beta_{10}$ | 3.40       | 94.60 | 2.00 | 2.20       | 94.80 | 3.00 |
|     | $\beta_{11}$ | 4.00       | 94.40 | 1.60 | 3.40       | 95.80 | 0.80 |
|     | $\beta_{20}$ | 2.20       | 94.60 | 3.20 | 1.20       | 95.20 | 3.60 |
|     | $\beta_{21}$ | 1.40       | 96.80 | 1.80 | 3.20       | 95.40 | 1.40 |

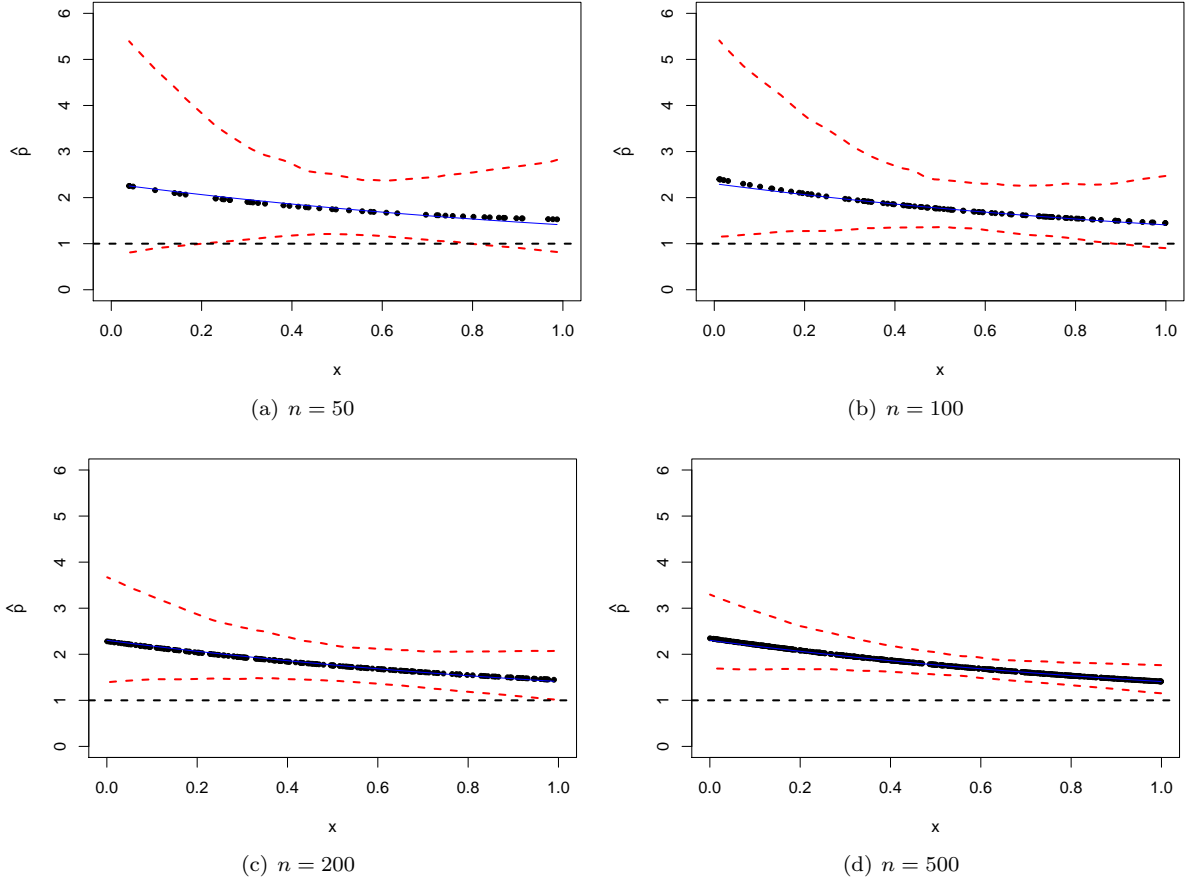

Figure 13: *Posterior* estimates for parameter  $p$  using zero-deflated artificial samples (Scenario 1).

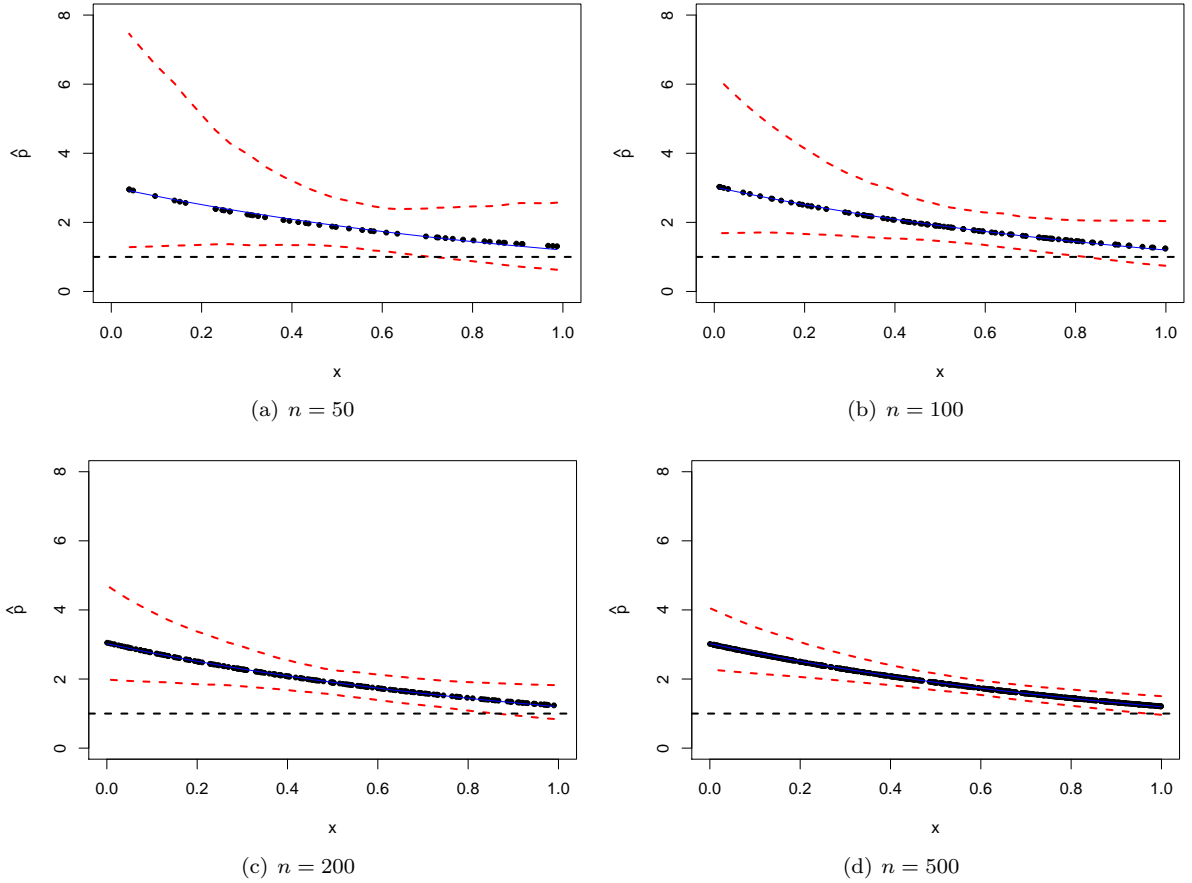

Figure 14: *Posterior* estimates for parameter  $p$  using zero-deflated artificial samples (Scenario 2).

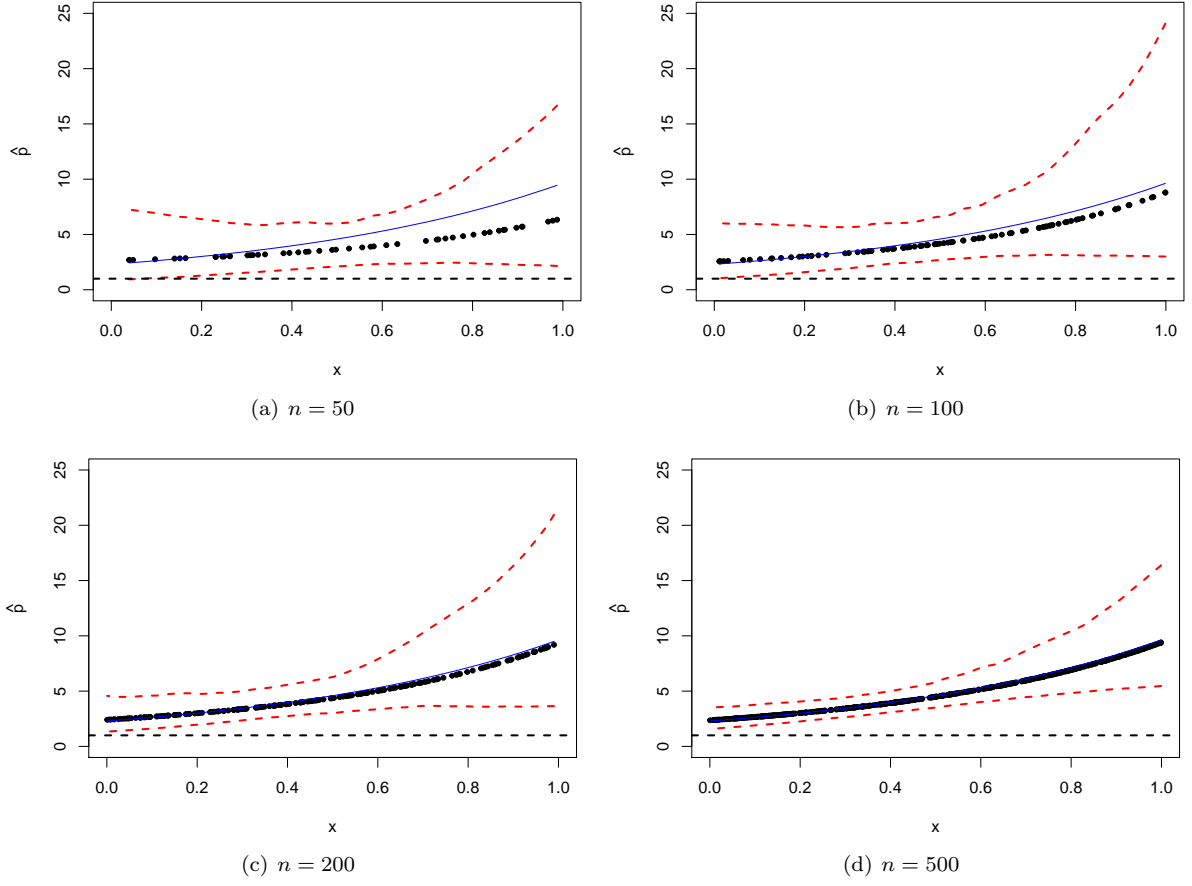

Figure 15: *Posterior* estimates for parameter  $p$  using zero-deflated artificial samples (Scenario 3).

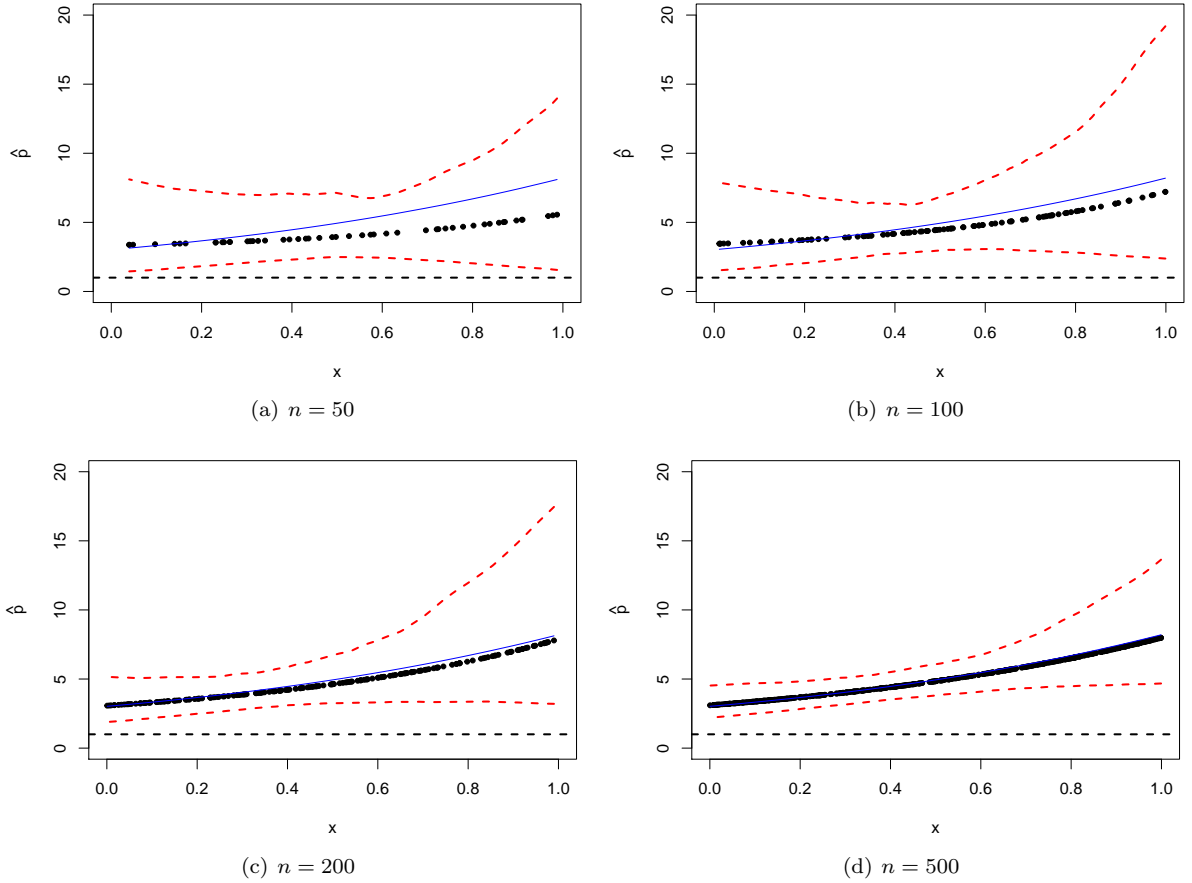

Figure 16: *Posterior* estimates for parameter  $p$  using zero-deflated artificial samples (Scenario 4).

## 2.2 Using *probit* link function

Table 25: Empirical properties of the Bayesian estimators using zero-deflated artificial samples (Scenarios 1 and 2).

| $n$        | Parameter    | Bias   | MSE   | $\sqrt{\frac{\text{MSE}}{\text{Var}}}$ | MAPE (%) |
|------------|--------------|--------|-------|----------------------------------------|----------|
| Scenario 1 |              |        |       |                                        |          |
| 50         | $\beta_{10}$ | 0.081  | 0.324 | 1.010                                  | 45.581   |
|            | $\beta_{11}$ | -0.164 | 0.839 | 1.016                                  | 74.955   |
|            | $\beta_{20}$ | -0.001 | 0.156 | 1.000                                  | 62.082   |
|            | $\beta_{21}$ | -0.050 | 0.471 | 1.003                                  | 109.956  |
| 100        | $\beta_{10}$ | 0.053  | 0.197 | 1.007                                  | 35.633   |
|            | $\beta_{11}$ | -0.075 | 0.485 | 1.006                                  | 55.800   |
|            | $\beta_{20}$ | -0.034 | 0.092 | 1.006                                  | 47.660   |
|            | $\beta_{21}$ | 0.030  | 0.301 | 1.002                                  | 86.294   |
| 200        | $\beta_{10}$ | 0.012  | 0.078 | 1.001                                  | 22.714   |
|            | $\beta_{11}$ | -0.017 | 0.231 | 1.001                                  | 38.300   |
|            | $\beta_{20}$ | -0.022 | 0.035 | 1.007                                  | 29.615   |
|            | $\beta_{21}$ | 0.020  | 0.123 | 1.002                                  | 55.809   |
| 500        | $\beta_{10}$ | 0.016  | 0.040 | 1.003                                  | 15.990   |
|            | $\beta_{11}$ | -0.028 | 0.098 | 1.004                                  | 25.124   |
|            | $\beta_{20}$ | 0.006  | 0.016 | 1.001                                  | 19.987   |
|            | $\beta_{21}$ | -0.011 | 0.047 | 1.001                                  | 35.119   |
| Scenario 2 |              |        |       |                                        |          |
| 50         | $\beta_{10}$ | 0.050  | 0.266 | 1.005                                  | 41.381   |
|            | $\beta_{11}$ | -0.084 | 0.744 | 1.005                                  | 67.351   |
|            | $\beta_{20}$ | -0.072 | 0.205 | 1.013                                  | 24.018   |
|            | $\beta_{21}$ | 0.057  | 0.512 | 1.003                                  | 56.514   |
| 100        | $\beta_{10}$ | 0.012  | 0.171 | 1.000                                  | 32.812   |
|            | $\beta_{11}$ | -0.022 | 0.445 | 1.001                                  | 52.762   |
|            | $\beta_{20}$ | -0.014 | 0.138 | 1.001                                  | 19.169   |
|            | $\beta_{21}$ | 0.002  | 0.380 | 1.000                                  | 48.545   |
| 200        | $\beta_{10}$ | 0.010  | 0.072 | 1.001                                  | 21.244   |
|            | $\beta_{11}$ | -0.020 | 0.214 | 1.001                                  | 37.192   |
|            | $\beta_{20}$ | -0.031 | 0.043 | 1.012                                  | 11.013   |
|            | $\beta_{21}$ | 0.042  | 0.136 | 1.007                                  | 29.241   |
| 500        | $\beta_{10}$ | 0.019  | 0.028 | 1.007                                  | 13.449   |
|            | $\beta_{11}$ | -0.028 | 0.074 | 1.005                                  | 21.794   |
|            | $\beta_{20}$ | 0.002  | 0.026 | 1.000                                  | 8.697    |
|            | $\beta_{21}$ | -0.004 | 0.061 | 1.000                                  | 19.548   |

Table 26: Empirical properties of the Bayesian estimators using zero-deflated artificial samples (Scenarios 3 and 4).

| $n$        | Parameter    | Bias   | MSE   | $\sqrt{\frac{\text{MSE}}{\text{Var}}}$ | MAPE (%) |
|------------|--------------|--------|-------|----------------------------------------|----------|
| Scenario 3 |              |        |       |                                        |          |
| 50         | $\beta_{10}$ | 0.018  | 0.371 | 1.000                                  | 47.775   |
|            | $\beta_{11}$ | 0.463  | 1.251 | 1.099                                  | 58.669   |
|            | $\beta_{20}$ | -0.019 | 0.146 | 1.001                                  | 60.599   |
|            | $\beta_{21}$ | -0.040 | 0.446 | 1.002                                  | 104.663  |
| 100        | $\beta_{10}$ | -0.003 | 0.287 | 1.000                                  | 43.011   |
|            | $\beta_{11}$ | 0.253  | 0.969 | 1.035                                  | 51.804   |
|            | $\beta_{20}$ | -0.020 | 0.079 | 1.002                                  | 44.592   |
|            | $\beta_{21}$ | 0.017  | 0.253 | 1.001                                  | 79.059   |
| 200        | $\beta_{10}$ | -0.028 | 0.125 | 1.003                                  | 27.594   |
|            | $\beta_{11}$ | 0.159  | 0.539 | 1.024                                  | 38.997   |
|            | $\beta_{20}$ | -0.003 | 0.035 | 1.000                                  | 29.779   |
|            | $\beta_{21}$ | 0.006  | 0.136 | 1.000                                  | 56.819   |
| 500        | $\beta_{10}$ | -0.005 | 0.058 | 1.000                                  | 19.370   |
|            | $\beta_{11}$ | 0.054  | 0.223 | 1.007                                  | 25.061   |
|            | $\beta_{20}$ | -0.002 | 0.014 | 1.000                                  | 19.111   |
|            | $\beta_{21}$ | -0.006 | 0.046 | 1.000                                  | 34.241   |
| Scenario 4 |              |        |       |                                        |          |
| 50         | $\beta_{10}$ | -0.076 | 0.372 | 1.008                                  | 48.160   |
|            | $\beta_{11}$ | 0.624  | 1.415 | 1.174                                  | 62.839   |
|            | $\beta_{20}$ | -0.069 | 0.215 | 1.011                                  | 25.209   |
|            | $\beta_{21}$ | 0.034  | 0.546 | 1.001                                  | 58.479   |
| 100        | $\beta_{10}$ | -0.051 | 0.231 | 1.006                                  | 38.240   |
|            | $\beta_{11}$ | 0.352  | 0.930 | 1.074                                  | 51.961   |
|            | $\beta_{20}$ | 0.013  | 0.119 | 1.001                                  | 17.847   |
|            | $\beta_{21}$ | -0.050 | 0.320 | 1.004                                  | 44.541   |
| 200        | $\beta_{10}$ | 0.005  | 0.111 | 1.000                                  | 25.939   |
|            | $\beta_{11}$ | 0.133  | 0.544 | 1.017                                  | 39.311   |
|            | $\beta_{20}$ | -0.010 | 0.059 | 1.001                                  | 12.777   |
|            | $\beta_{21}$ | 0.001  | 0.163 | 1.000                                  | 32.126   |
| 500        | $\beta_{10}$ | -0.001 | 0.045 | 1.000                                  | 17.131   |
|            | $\beta_{11}$ | 0.079  | 0.185 | 1.017                                  | 23.264   |
|            | $\beta_{20}$ | -0.011 | 0.022 | 1.003                                  | 8.025    |
|            | $\beta_{21}$ | 0.014  | 0.054 | 1.002                                  | 18.553   |

Table 27: *Posterior* estimates for model parameters using zero-deflated artificial samples (Scenarios 1 and 2).

| $n$        | Parameter    | Mean   | Median | Std. Dev. | 95% HPDI |        |
|------------|--------------|--------|--------|-----------|----------|--------|
|            |              |        |        |           | Lower    | Upper  |
| Scenario 1 |              |        |        |           |          |        |
| 50         | $\beta_{10}$ | -0.919 | -0.906 | 0.563     | -2.094   | 0.239  |
|            | $\beta_{11}$ | 0.836  | 0.832  | 0.901     | -0.993   | 2.668  |
|            | $\beta_{20}$ | 0.499  | 0.495  | 0.394     | -0.267   | 1.276  |
|            | $\beta_{21}$ | 0.450  | 0.446  | 0.684     | -0.905   | 1.811  |
| 100        | $\beta_{10}$ | -0.947 | -0.940 | 0.440     | -1.850   | -0.054 |
|            | $\beta_{11}$ | 0.925  | 0.922  | 0.693     | -0.500   | 2.357  |
|            | $\beta_{20}$ | 0.466  | 0.464  | 0.302     | -0.114   | 1.047  |
|            | $\beta_{21}$ | 0.530  | 0.528  | 0.548     | -0.501   | 1.560  |
| 200        | $\beta_{10}$ | -0.988 | -0.985 | 0.280     | -1.567   | -0.412 |
|            | $\beta_{11}$ | 0.983  | 0.982  | 0.480     | 0.025    | 1.945  |
|            | $\beta_{20}$ | 0.478  | 0.477  | 0.186     | 0.114    | 0.844  |
|            | $\beta_{21}$ | 0.520  | 0.518  | 0.350     | -0.176   | 1.214  |
| 500        | $\beta_{10}$ | -0.984 | -0.983 | 0.199     | -1.362   | -0.608 |
|            | $\beta_{11}$ | 0.972  | 0.972  | 0.311     | 0.385    | 1.560  |
|            | $\beta_{20}$ | 0.506  | 0.506  | 0.125     | 0.269    | 0.744  |
|            | $\beta_{21}$ | 0.489  | 0.489  | 0.217     | 0.068    | 0.909  |
| Scenario 2 |              |        |        |           |          |        |
| 50         | $\beta_{10}$ | -0.950 | -0.938 | 0.514     | -2.034   | 0.121  |
|            | $\beta_{11}$ | 0.916  | 0.914  | 0.858     | -0.855   | 2.694  |
|            | $\beta_{20}$ | 1.428  | 1.410  | 0.447     | 0.496    | 2.388  |
|            | $\beta_{21}$ | -0.943 | -0.931 | 0.713     | -2.445   | 0.534  |
| 100        | $\beta_{10}$ | -0.988 | -0.981 | 0.413     | -1.826   | -0.160 |
|            | $\beta_{11}$ | 0.978  | 0.976  | 0.667     | -0.406   | 2.370  |
|            | $\beta_{20}$ | 1.486  | 1.477  | 0.371     | 0.771    | 2.218  |
|            | $\beta_{21}$ | -0.998 | -0.991 | 0.616     | -2.162   | 0.154  |
| 200        | $\beta_{10}$ | -0.990 | -0.987 | 0.268     | -1.521   | -0.462 |
|            | $\beta_{11}$ | 0.980  | 0.981  | 0.463     | 0.048    | 1.915  |
|            | $\beta_{20}$ | 1.469  | 1.465  | 0.205     | 1.017    | 1.924  |
|            | $\beta_{21}$ | -0.958 | -0.956 | 0.366     | -1.726   | -0.194 |
| 500        | $\beta_{10}$ | -0.981 | -0.980 | 0.167     | -1.327   | -0.636 |
|            | $\beta_{11}$ | 0.972  | 0.972  | 0.270     | 0.403    | 1.540  |
|            | $\beta_{20}$ | 1.502  | 1.500  | 0.163     | 1.204    | 1.803  |
|            | $\beta_{21}$ | -1.004 | -1.003 | 0.246     | -1.475   | -0.536 |



Table 28: *Posterior* estimates for model parameters using zero-deflated artificial samples (Scenarios 3 and 4).

| $n$        | Parameter    | Mean   | Median | Std. Dev. | 95% HPDI |        |
|------------|--------------|--------|--------|-----------|----------|--------|
|            |              |        |        |           | Lower    | Upper  |
| Scenario 3 |              |        |        |           |          |        |
| 50         | $\beta_{10}$ | -0.982 | -0.960 | 0.609     | -2.438   | 0.431  |
|            | $\beta_{11}$ | -1.037 | -1.023 | 1.018     | -3.661   | 1.571  |
|            | $\beta_{20}$ | 0.481  | 0.477  | 0.381     | -0.284   | 1.248  |
|            | $\beta_{21}$ | 0.460  | 0.456  | 0.666     | -0.883   | 1.816  |
| 100        | $\beta_{10}$ | -1.003 | -0.989 | 0.536     | -2.138   | 0.113  |
|            | $\beta_{11}$ | -1.247 | -1.240 | 0.951     | -3.347   | 0.841  |
|            | $\beta_{20}$ | 0.480  | 0.479  | 0.281     | -0.100   | 1.063  |
|            | $\beta_{21}$ | 0.517  | 0.515  | 0.503     | -0.514   | 1.551  |
| 200        | $\beta_{10}$ | -1.028 | -1.022 | 0.352     | -1.750   | -0.312 |
|            | $\beta_{11}$ | -1.341 | -1.332 | 0.717     | -2.829   | 0.126  |
|            | $\beta_{20}$ | 0.497  | 0.496  | 0.187     | 0.133    | 0.863  |
|            | $\beta_{21}$ | 0.506  | 0.504  | 0.368     | -0.188   | 1.203  |
| 500        | $\beta_{10}$ | -1.005 | -1.002 | 0.240     | -1.475   | -0.536 |
|            | $\beta_{11}$ | -1.446 | -1.443 | 0.470     | -2.354   | -0.540 |
|            | $\beta_{20}$ | 0.498  | 0.498  | 0.120     | 0.261    | 0.736  |
|            | $\beta_{21}$ | 0.494  | 0.494  | 0.214     | 0.074    | 0.913  |
| Scenario 4 |              |        |        |           |          |        |
| 50         | $\beta_{10}$ | -1.076 | -1.056 | 0.605     | -2.432   | 0.241  |
|            | $\beta_{11}$ | -0.876 | -0.862 | 1.013     | -3.440   | 1.667  |
|            | $\beta_{20}$ | 1.431  | 1.414  | 0.459     | 0.503    | 2.389  |
|            | $\beta_{21}$ | -0.966 | -0.956 | 0.738     | -2.459   | 0.509  |
| 100        | $\beta_{10}$ | -1.051 | -1.039 | 0.478     | -2.089   | -0.028 |
|            | $\beta_{11}$ | -1.147 | -1.140 | 0.898     | -3.168   | 0.856  |
|            | $\beta_{20}$ | 1.513  | 1.503  | 0.345     | 0.795    | 2.250  |
|            | $\beta_{21}$ | -1.050 | -1.043 | 0.563     | -2.218   | 0.105  |
| 200        | $\beta_{10}$ | -0.995 | -0.990 | 0.332     | -1.645   | -0.353 |
|            | $\beta_{11}$ | -1.367 | -1.356 | 0.725     | -2.797   | 0.049  |
|            | $\beta_{20}$ | 1.490  | 1.486  | 0.242     | 1.034    | 1.952  |
|            | $\beta_{21}$ | -0.999 | -0.997 | 0.404     | -1.771   | -0.233 |
| 500        | $\beta_{10}$ | -1.001 | -0.999 | 0.212     | -1.425   | -0.581 |
|            | $\beta_{11}$ | -1.421 | -1.418 | 0.423     | -2.297   | -0.552 |
|            | $\beta_{20}$ | 1.489  | 1.487  | 0.150     | 1.192    | 1.789  |
|            | $\beta_{21}$ | -0.986 | -0.984 | 0.233     | -1.456   | -0.518 |

Table 29: Coverage probabilities (%) of the HPDIs using zero-deflated artificial samples (Scenarios 1 and 2).

| $n$ | Parameter    | BNCP       | CP    | ANCP | BNCP       | CP    | ANCP |
|-----|--------------|------------|-------|------|------------|-------|------|
|     |              | Scenario 1 |       |      | Scenario 2 |       |      |
| 50  | $\beta_{10}$ | 4.60       | 94.80 | 0.60 | 3.40       | 96.20 | 0.40 |
|     | $\beta_{11}$ | 0.80       | 96.80 | 2.40 | 1.60       | 95.80 | 2.60 |
|     | $\beta_{20}$ | 1.60       | 95.80 | 2.60 | 0.00       | 97.00 | 3.00 |
|     | $\beta_{21}$ | 1.40       | 96.00 | 2.60 | 1.60       | 97.80 | 0.60 |
| 100 | $\beta_{10}$ | 3.60       | 95.20 | 1.20 | 2.60       | 96.40 | 1.00 |
|     | $\beta_{11}$ | 0.80       | 96.00 | 3.20 | 1.60       | 96.60 | 1.80 |
|     | $\beta_{20}$ | 1.60       | 95.40 | 3.00 | 1.60       | 94.20 | 4.20 |
|     | $\beta_{21}$ | 2.80       | 94.40 | 2.80 | 3.40       | 94.60 | 2.00 |
| 200 | $\beta_{10}$ | 2.60       | 96.20 | 1.20 | 2.80       | 95.40 | 1.80 |
|     | $\beta_{11}$ | 2.20       | 96.00 | 1.80 | 1.60       | 96.20 | 2.20 |
|     | $\beta_{20}$ | 1.80       | 94.80 | 3.40 | 0.80       | 95.60 | 3.60 |
|     | $\beta_{21}$ | 1.80       | 95.40 | 2.80 | 3.40       | 95.40 | 1.20 |
| 500 | $\beta_{10}$ | 4.60       | 93.60 | 1.80 | 4.00       | 94.80 | 1.20 |
|     | $\beta_{11}$ | 2.00       | 94.40 | 3.60 | 1.00       | 96.60 | 2.40 |
|     | $\beta_{20}$ | 1.80       | 95.40 | 2.80 | 3.00       | 94.00 | 3.00 |
|     | $\beta_{21}$ | 3.20       | 94.60 | 2.20 | 2.60       | 94.20 | 3.20 |

Table 30: Coverage probabilities (%) of the HPDIs using zero-deflated artificial samples (Scenarios 3 and 4).

| $n$ | Parameter    | BNCP       | CP    | ANCP | BNCP       | CP    | ANCP |
|-----|--------------|------------|-------|------|------------|-------|------|
|     |              | Scenario 3 |       |      | Scenario 4 |       |      |
| 50  | $\beta_{10}$ | 1.80       | 98.00 | 0.20 | 1.00       | 98.00 | 1.00 |
|     | $\beta_{11}$ | 1.80       | 98.00 | 0.20 | 3.80       | 96.20 | 0.00 |
|     | $\beta_{20}$ | 1.40       | 95.60 | 3.00 | 0.40       | 96.00 | 3.60 |
|     | $\beta_{21}$ | 1.40       | 96.00 | 2.60 | 3.20       | 95.60 | 1.20 |
| 100 | $\beta_{10}$ | 1.40       | 98.20 | 0.40 | 2.00       | 97.20 | 0.80 |
|     | $\beta_{11}$ | 2.60       | 97.00 | 0.40 | 2.20       | 97.20 | 0.60 |
|     | $\beta_{20}$ | 1.80       | 96.40 | 1.80 | 0.60       | 97.00 | 2.40 |
|     | $\beta_{21}$ | 2.00       | 95.60 | 2.40 | 1.40       | 96.80 | 1.80 |
| 200 | $\beta_{10}$ | 2.60       | 95.80 | 1.60 | 4.00       | 93.40 | 2.60 |
|     | $\beta_{11}$ | 3.20       | 96.20 | 0.60 | 5.60       | 93.40 | 1.00 |
|     | $\beta_{20}$ | 2.40       | 95.40 | 2.20 | 2.00       | 94.60 | 3.40 |
|     | $\beta_{21}$ | 2.40       | 94.40 | 3.20 | 2.60       | 94.60 | 2.80 |
| 500 | $\beta_{10}$ | 2.20       | 95.60 | 2.20 | 3.20       | 95.60 | 1.20 |
|     | $\beta_{11}$ | 4.00       | 94.00 | 2.00 | 2.40       | 96.80 | 0.80 |
|     | $\beta_{20}$ | 3.60       | 94.80 | 1.60 | 1.40       | 94.40 | 4.20 |
|     | $\beta_{21}$ | 2.40       | 94.40 | 3.20 | 2.40       | 95.60 | 2.00 |

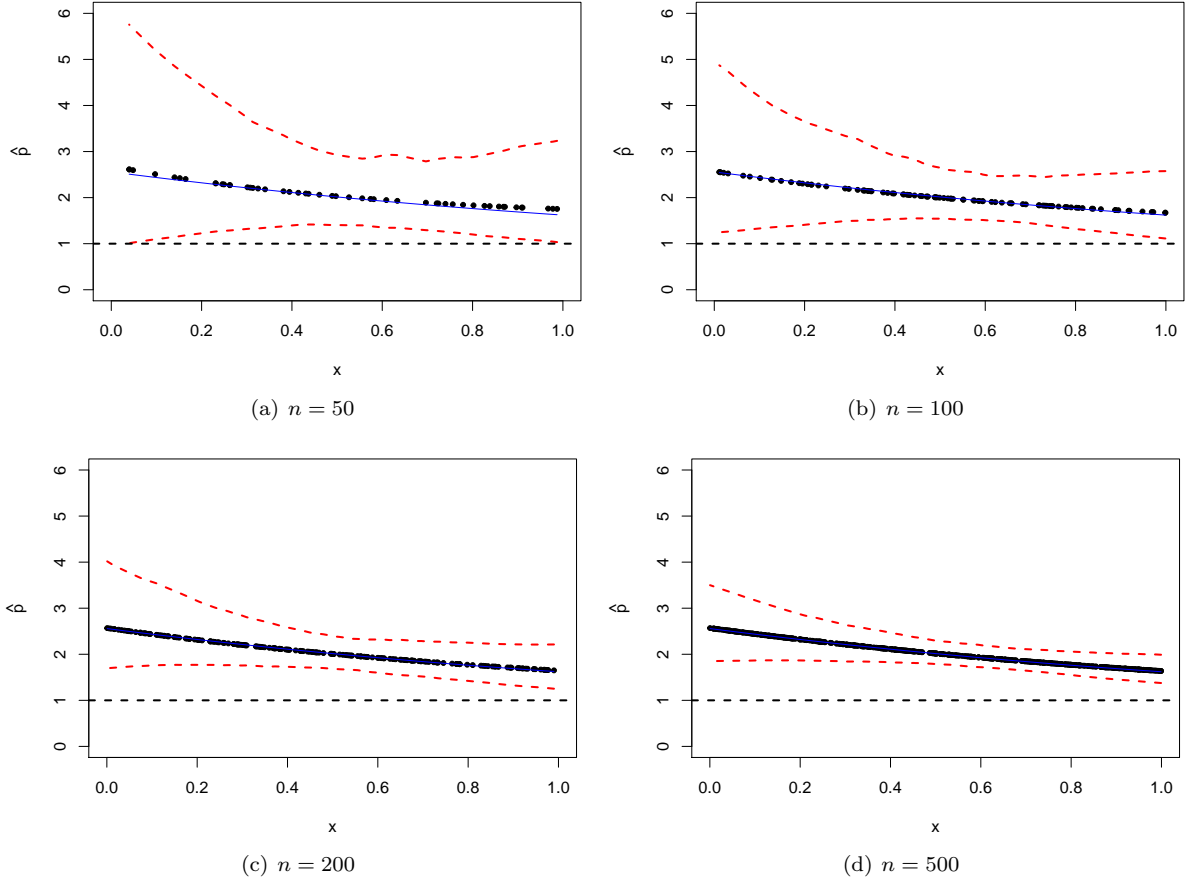

Figure 17: *Posterior* estimates for parameter  $p$  using zero-deflated artificial samples (Scenario 1).

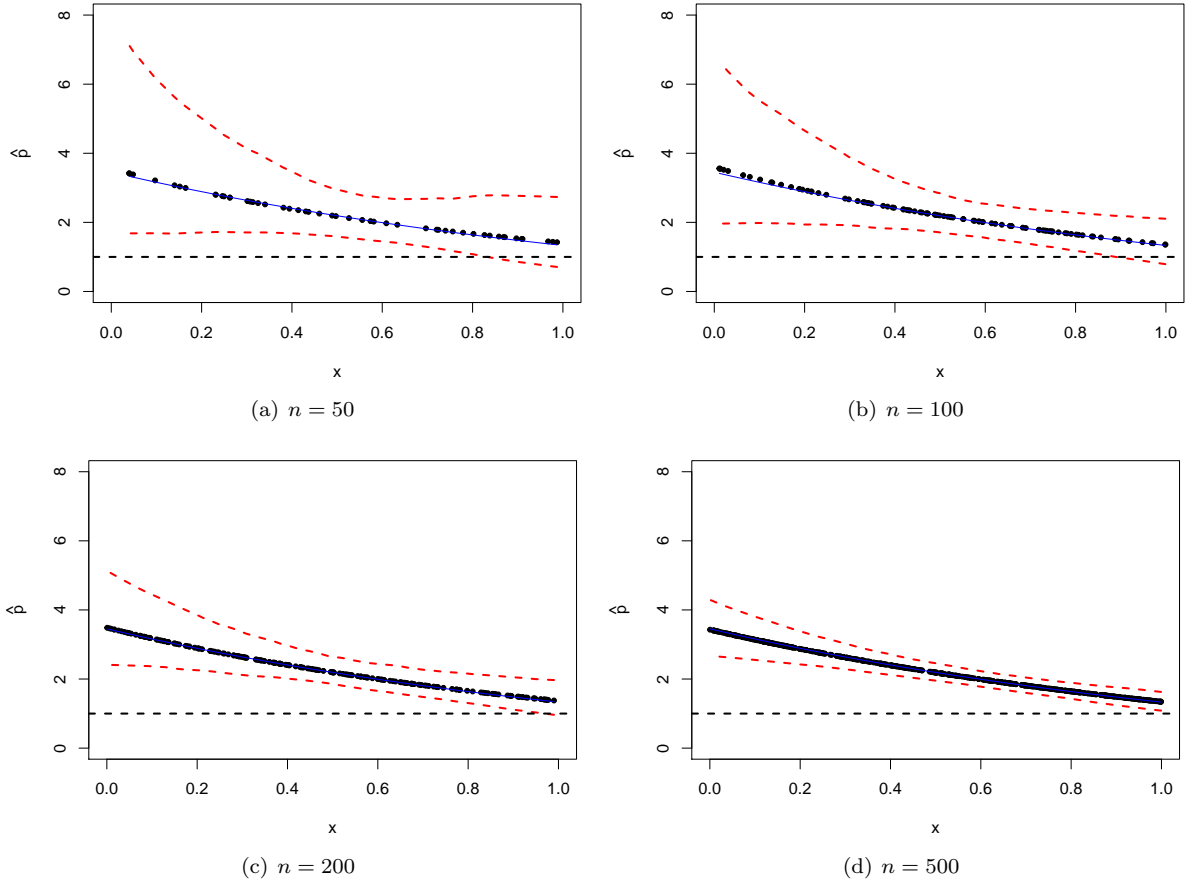

Figure 18: *Posterior* estimates for parameter  $p$  using zero-deflated artificial samples (Scenario 2).

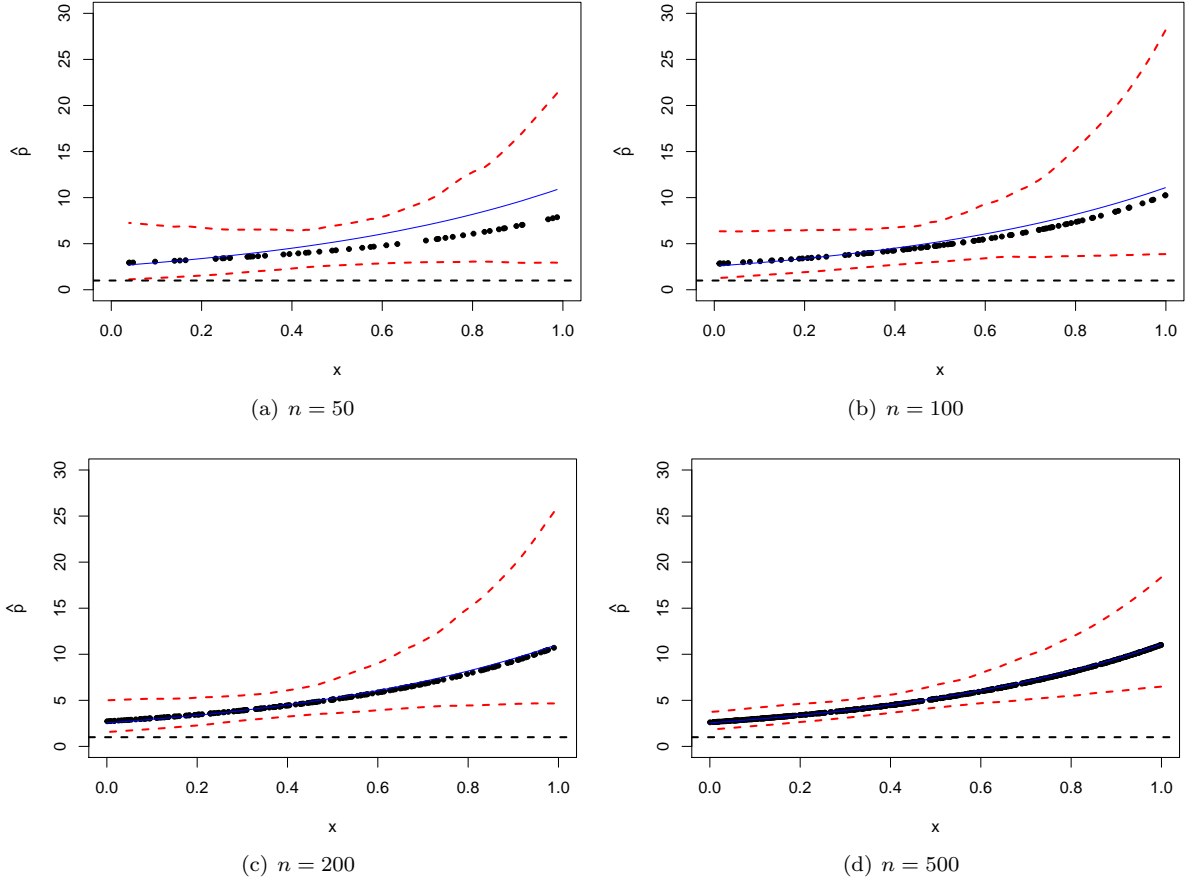

Figure 19: *Posterior* estimates for parameter  $p$  using zero-deflated artificial samples (Scenario 3).

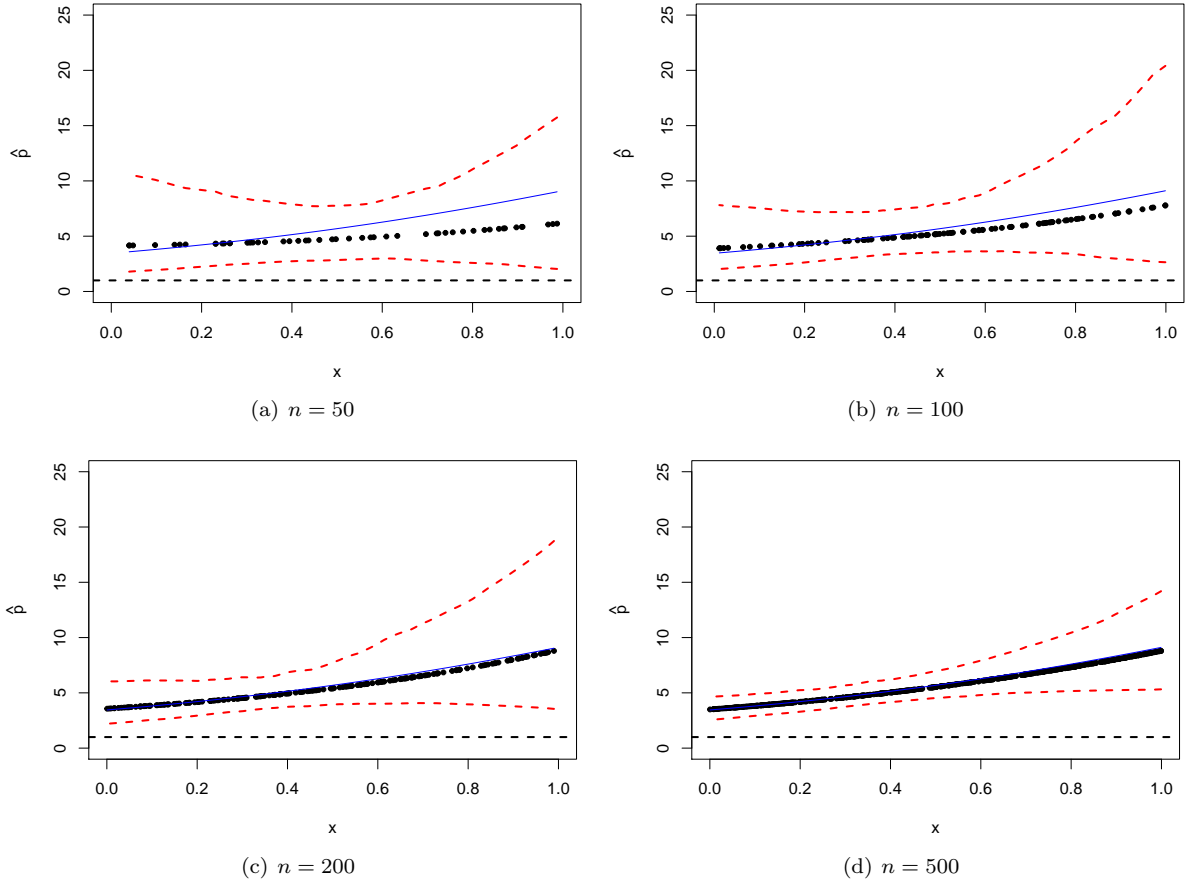

Figure 20: *Posterior* estimates for parameter  $p$  using zero-deflated artificial samples (Scenario 4).

### 2.3 Using *complementary log-log* link function

Table 31: Empirical properties of the Bayesian estimators using zero-deflated artificial samples (Scenarios 1 and 2).

| $n$        | Parameter    | Bias   | MSE   | $\sqrt{\frac{\text{MSE}}{\text{Var}}}$ | MAPE (%) |
|------------|--------------|--------|-------|----------------------------------------|----------|
| Scenario 1 |              |        |       |                                        |          |
| 50         | $\beta_{10}$ | 0.029  | 0.293 | 1.001                                  | 43.753   |
|            | $\beta_{11}$ | -0.053 | 0.701 | 1.002                                  | 66.609   |
|            | $\beta_{20}$ | 0.003  | 0.145 | 1.000                                  | 58.741   |
|            | $\beta_{21}$ | 0.026  | 0.453 | 1.001                                  | 104.497  |
| 100        | $\beta_{10}$ | 0.038  | 0.173 | 1.004                                  | 33.532   |
|            | $\beta_{11}$ | -0.076 | 0.442 | 1.007                                  | 52.590   |
|            | $\beta_{20}$ | 0.008  | 0.084 | 1.000                                  | 45.671   |
|            | $\beta_{21}$ | -0.018 | 0.265 | 1.001                                  | 81.344   |
| 200        | $\beta_{10}$ | -0.008 | 0.083 | 1.000                                  | 23.138   |
|            | $\beta_{11}$ | -0.005 | 0.227 | 1.000                                  | 38.595   |
|            | $\beta_{20}$ | -0.015 | 0.037 | 1.003                                  | 30.755   |
|            | $\beta_{21}$ | 0.024  | 0.128 | 1.002                                  | 57.261   |
| 500        | $\beta_{10}$ | 0.016  | 0.030 | 1.004                                  | 14.056   |
|            | $\beta_{11}$ | -0.024 | 0.073 | 1.004                                  | 21.857   |
|            | $\beta_{20}$ | 0.000  | 0.013 | 1.000                                  | 18.317   |
|            | $\beta_{21}$ | 0.001  | 0.038 | 1.000                                  | 31.269   |
| Scenario 2 |              |        |       |                                        |          |
| 50         | $\beta_{10}$ | 0.051  | 0.227 | 1.006                                  | 37.842   |
|            | $\beta_{11}$ | -0.087 | 0.653 | 1.006                                  | 63.138   |
|            | $\beta_{20}$ | 0.018  | 0.241 | 1.001                                  | 26.949   |
|            | $\beta_{21}$ | -0.021 | 0.604 | 1.000                                  | 62.615   |
| 100        | $\beta_{10}$ | 0.046  | 0.148 | 1.007                                  | 30.337   |
|            | $\beta_{11}$ | -0.075 | 0.421 | 1.007                                  | 51.438   |
|            | $\beta_{20}$ | -0.003 | 0.141 | 1.000                                  | 19.373   |
|            | $\beta_{21}$ | -0.005 | 0.344 | 1.000                                  | 45.974   |
| 200        | $\beta_{10}$ | 0.013  | 0.065 | 1.001                                  | 20.105   |
|            | $\beta_{11}$ | -0.028 | 0.188 | 1.002                                  | 34.055   |
|            | $\beta_{20}$ | 0.012  | 0.051 | 1.001                                  | 11.641   |
|            | $\beta_{21}$ | -0.010 | 0.131 | 1.000                                  | 28.292   |
| 500        | $\beta_{10}$ | 0.008  | 0.028 | 1.001                                  | 13.446   |
|            | $\beta_{11}$ | -0.013 | 0.072 | 1.001                                  | 21.606   |
|            | $\beta_{20}$ | 0.003  | 0.026 | 1.000                                  | 8.472    |
|            | $\beta_{21}$ | -0.012 | 0.059 | 1.001                                  | 19.093   |

Table 32: Empirical properties of the Bayesian estimators using zero-deflated artificial samples (Scenarios 3 and 4).

| $n$        | Parameter    | Bias   | MSE   | $\sqrt{\frac{\text{MSE}}{\text{Var}}}$ | MAPE (%) |
|------------|--------------|--------|-------|----------------------------------------|----------|
| Scenario 3 |              |        |       |                                        |          |
| 50         | $\beta_{10}$ | 0.046  | 0.333 | 1.003                                  | 45.611   |
|            | $\beta_{11}$ | 0.370  | 1.070 | 1.071                                  | 55.202   |
|            | $\beta_{20}$ | -0.008 | 0.149 | 1.000                                  | 59.638   |
|            | $\beta_{21}$ | 0.000  | 0.478 | 1.000                                  | 105.774  |
| 100        | $\beta_{10}$ | -0.013 | 0.246 | 1.000                                  | 39.508   |
|            | $\beta_{11}$ | 0.294  | 0.834 | 1.056                                  | 48.762   |
|            | $\beta_{20}$ | -0.005 | 0.082 | 1.000                                  | 44.686   |
|            | $\beta_{21}$ | -0.009 | 0.230 | 1.000                                  | 75.884   |
| 200        | $\beta_{10}$ | 0.007  | 0.100 | 1.000                                  | 25.257   |
|            | $\beta_{11}$ | 0.129  | 0.482 | 1.018                                  | 36.353   |
|            | $\beta_{20}$ | -0.006 | 0.029 | 1.001                                  | 26.834   |
|            | $\beta_{21}$ | -0.004 | 0.111 | 1.000                                  | 53.146   |
| 500        | $\beta_{10}$ | -0.002 | 0.051 | 1.000                                  | 18.389   |
|            | $\beta_{11}$ | 0.048  | 0.179 | 1.006                                  | 22.600   |
|            | $\beta_{20}$ | 0.003  | 0.014 | 1.000                                  | 19.103   |
|            | $\beta_{21}$ | -0.009 | 0.045 | 1.001                                  | 34.072   |
| Scenario 4 |              |        |       |                                        |          |
| 50         | $\beta_{10}$ | -0.038 | 0.322 | 1.002                                  | 45.114   |
|            | $\beta_{11}$ | 0.564  | 1.249 | 1.159                                  | 58.836   |
|            | $\beta_{20}$ | -0.024 | 0.225 | 1.001                                  | 25.803   |
|            | $\beta_{21}$ | -0.003 | 0.524 | 1.000                                  | 58.195   |
| 100        | $\beta_{10}$ | 0.013  | 0.228 | 1.000                                  | 38.213   |
|            | $\beta_{11}$ | 0.188  | 0.898 | 1.020                                  | 49.778   |
|            | $\beta_{20}$ | 0.010  | 0.140 | 1.000                                  | 19.337   |
|            | $\beta_{21}$ | -0.042 | 0.334 | 1.003                                  | 45.964   |
| 200        | $\beta_{10}$ | -0.015 | 0.088 | 1.001                                  | 23.347   |
|            | $\beta_{11}$ | 0.163  | 0.449 | 1.031                                  | 35.552   |
|            | $\beta_{20}$ | -0.008 | 0.064 | 1.000                                  | 13.124   |
|            | $\beta_{21}$ | 0.021  | 0.169 | 1.001                                  | 32.044   |
| 500        | $\beta_{10}$ | 0.007  | 0.041 | 1.000                                  | 16.224   |
|            | $\beta_{11}$ | 0.031  | 0.170 | 1.003                                  | 21.934   |
|            | $\beta_{20}$ | 0.011  | 0.027 | 1.002                                  | 8.345    |
|            | $\beta_{21}$ | -0.013 | 0.058 | 1.002                                  | 18.718   |

Table 33: *Posterior* estimates for model parameters using zero-deflated artificial samples (Scenarios 1 and 2).

| $n$        | Parameter    | Mean   | Median | Std. Dev. | 95% HPDI |        |
|------------|--------------|--------|--------|-----------|----------|--------|
|            |              |        |        |           | Lower    | Upper  |
| Scenario 1 |              |        |        |           |          |        |
| 50         | $\beta_{10}$ | -0.971 | -0.960 | 0.540     | -2.078   | 0.113  |
|            | $\beta_{11}$ | 0.947  | 0.943  | 0.836     | -0.760   | 2.667  |
|            | $\beta_{20}$ | 0.503  | 0.506  | 0.381     | -0.256   | 1.256  |
|            | $\beta_{21}$ | 0.526  | 0.513  | 0.672     | -0.831   | 1.907  |
| 100        | $\beta_{10}$ | -0.962 | -0.956 | 0.414     | -1.805   | -0.126 |
|            | $\beta_{11}$ | 0.924  | 0.922  | 0.661     | -0.418   | 2.270  |
|            | $\beta_{20}$ | 0.508  | 0.511  | 0.290     | -0.051   | 1.062  |
|            | $\beta_{21}$ | 0.482  | 0.478  | 0.514     | -0.499   | 1.474  |
| 200        | $\beta_{10}$ | -1.008 | -1.006 | 0.287     | -1.550   | -0.470 |
|            | $\beta_{11}$ | 0.995  | 0.995  | 0.476     | 0.095    | 1.897  |
|            | $\beta_{20}$ | 0.485  | 0.486  | 0.191     | 0.139    | 0.829  |
|            | $\beta_{21}$ | 0.524  | 0.522  | 0.358     | -0.132   | 1.181  |
| 500        | $\beta_{10}$ | -0.984 | -0.983 | 0.174     | -1.338   | -0.633 |
|            | $\beta_{11}$ | 0.976  | 0.975  | 0.270     | 0.424    | 1.528  |
|            | $\beta_{20}$ | 0.500  | 0.500  | 0.113     | 0.277    | 0.722  |
|            | $\beta_{21}$ | 0.501  | 0.500  | 0.194     | 0.110    | 0.892  |
| Scenario 2 |              |        |        |           |          |        |
| 50         | $\beta_{10}$ | -0.949 | -0.939 | 0.474     | -1.991   | 0.077  |
|            | $\beta_{11}$ | 0.913  | 0.911  | 0.803     | -0.768   | 2.600  |
|            | $\beta_{20}$ | 1.518  | 1.477  | 0.491     | 0.488    | 2.633  |
|            | $\beta_{21}$ | -1.021 | -0.984 | 0.777     | -2.690   | 0.579  |
| 100        | $\beta_{10}$ | -0.954 | -0.948 | 0.382     | -1.750   | -0.168 |
|            | $\beta_{11}$ | 0.925  | 0.924  | 0.644     | -0.384   | 2.233  |
|            | $\beta_{20}$ | 1.497  | 1.480  | 0.376     | 0.756    | 2.270  |
|            | $\beta_{21}$ | -1.005 | -0.986 | 0.586     | -2.210   | 0.168  |
| 200        | $\beta_{10}$ | -0.987 | -0.985 | 0.254     | -1.496   | -0.484 |
|            | $\beta_{11}$ | 0.972  | 0.972  | 0.432     | 0.090    | 1.855  |
|            | $\beta_{20}$ | 1.512  | 1.505  | 0.226     | 1.046    | 1.991  |
|            | $\beta_{21}$ | -1.010 | -1.002 | 0.362     | -1.792   | -0.242 |
| 500        | $\beta_{10}$ | -0.992 | -0.991 | 0.169     | -1.325   | -0.661 |
|            | $\beta_{11}$ | 0.987  | 0.987  | 0.268     | 0.447    | 1.525  |
|            | $\beta_{20}$ | 1.503  | 1.500  | 0.162     | 1.206    | 1.804  |
|            | $\beta_{21}$ | -1.012 | -1.009 | 0.243     | -1.478   | -0.552 |

Table 34: *Posterior* estimates for model parameters using zero-deflated artificial samples (Scenarios 3 and 4).

| $n$        | Parameter    | Mean   | Median | Std. Dev. | 95% HPDI |        |
|------------|--------------|--------|--------|-----------|----------|--------|
|            |              |        |        |           | Lower    | Upper  |
| Scenario 3 |              |        |        |           |          |        |
| 50         | $\beta_{10}$ | -0.954 | -0.935 | 0.576     | -2.304   | 0.363  |
|            | $\beta_{11}$ | -1.131 | -1.117 | 0.966     | -3.610   | 1.332  |
|            | $\beta_{20}$ | 0.492  | 0.496  | 0.386     | -0.264   | 1.243  |
|            | $\beta_{21}$ | 0.500  | 0.489  | 0.691     | -0.845   | 1.866  |
| 100        | $\beta_{10}$ | -1.013 | -1.001 | 0.496     | -2.073   | 0.029  |
|            | $\beta_{11}$ | -1.206 | -1.200 | 0.864     | -3.170   | 0.750  |
|            | $\beta_{20}$ | 0.495  | 0.498  | 0.286     | -0.063   | 1.047  |
|            | $\beta_{21}$ | 0.491  | 0.488  | 0.479     | -0.488   | 1.476  |
| 200        | $\beta_{10}$ | -0.993 | -0.988 | 0.316     | -1.664   | -0.333 |
|            | $\beta_{11}$ | -1.371 | -1.363 | 0.682     | -2.756   | 0.002  |
|            | $\beta_{20}$ | 0.494  | 0.495  | 0.169     | 0.149    | 0.836  |
|            | $\beta_{21}$ | 0.496  | 0.494  | 0.333     | -0.155   | 1.150  |
| 500        | $\beta_{10}$ | -1.002 | -1.000 | 0.226     | -1.440   | -0.568 |
|            | $\beta_{11}$ | -1.452 | -1.450 | 0.421     | -2.304   | -0.602 |
|            | $\beta_{20}$ | 0.503  | 0.504  | 0.120     | 0.280    | 0.725  |
|            | $\beta_{21}$ | 0.491  | 0.491  | 0.212     | 0.101    | 0.881  |
| Scenario 4 |              |        |        |           |          |        |
| 50         | $\beta_{10}$ | -1.038 | -1.020 | 0.566     | -2.329   | 0.224  |
|            | $\beta_{11}$ | -0.936 | -0.921 | 0.964     | -3.372   | 1.476  |
|            | $\beta_{20}$ | 1.476  | 1.440  | 0.474     | 0.477    | 2.552  |
|            | $\beta_{21}$ | -1.003 | -0.967 | 0.724     | -2.620   | 0.549  |
| 100        | $\beta_{10}$ | -0.987 | -0.977 | 0.477     | -1.984   | -0.011 |
|            | $\beta_{11}$ | -1.312 | -1.303 | 0.929     | -3.247   | 0.616  |
|            | $\beta_{20}$ | 1.510  | 1.493  | 0.375     | 0.766    | 2.287  |
|            | $\beta_{21}$ | -1.042 | -1.021 | 0.576     | -2.251   | 0.134  |
| 200        | $\beta_{10}$ | -1.015 | -1.011 | 0.296     | -1.643   | -0.394 |
|            | $\beta_{11}$ | -1.337 | -1.328 | 0.650     | -2.696   | 0.008  |
|            | $\beta_{20}$ | 1.492  | 1.485  | 0.253     | 1.028    | 1.967  |
|            | $\beta_{21}$ | -0.979 | -0.971 | 0.410     | -1.757   | -0.211 |
| 500        | $\beta_{10}$ | -0.993 | -0.992 | 0.203     | -1.403   | -0.589 |
|            | $\beta_{11}$ | -1.469 | -1.466 | 0.411     | -2.304   | -0.635 |
|            | $\beta_{20}$ | 1.511  | 1.508  | 0.163     | 1.212    | 1.813  |
|            | $\beta_{21}$ | -1.013 | -1.010 | 0.241     | -1.479   | -0.551 |



Table 35: Coverage probabilities (%) of the HPDIs using zero-deflated artificial samples (Scenarios 1 and 2).

| $n$ | Parameter    | BNCP       | CP    | ANCP | BNCP       | CP    | ANCP |
|-----|--------------|------------|-------|------|------------|-------|------|
|     |              | Scenario 1 |       |      | Scenario 2 |       |      |
| 50  | $\beta_{10}$ | 3.40       | 95.80 | 0.80 | 3.40       | 95.80 | 0.80 |
|     | $\beta_{11}$ | 1.20       | 96.60 | 2.20 | 1.00       | 96.00 | 3.00 |
|     | $\beta_{20}$ | 1.60       | 96.80 | 1.60 | 0.00       | 97.40 | 2.60 |
|     | $\beta_{21}$ | 0.80       | 97.40 | 1.80 | 2.00       | 98.00 | 0.00 |
| 100 | $\beta_{10}$ | 3.20       | 96.20 | 0.60 | 3.80       | 94.60 | 1.60 |
|     | $\beta_{11}$ | 1.20       | 95.80 | 3.00 | 1.80       | 95.80 | 2.40 |
|     | $\beta_{20}$ | 2.00       | 96.80 | 1.20 | 0.40       | 96.80 | 2.80 |
|     | $\beta_{21}$ | 2.40       | 96.00 | 1.60 | 2.40       | 96.80 | 0.80 |
| 200 | $\beta_{10}$ | 3.00       | 93.80 | 3.20 | 2.60       | 95.20 | 2.20 |
|     | $\beta_{11}$ | 2.20       | 95.00 | 2.80 | 2.00       | 96.00 | 2.00 |
|     | $\beta_{20}$ | 3.20       | 93.80 | 3.00 | 0.60       | 96.80 | 2.60 |
|     | $\beta_{21}$ | 3.40       | 94.40 | 2.20 | 2.20       | 97.40 | 0.40 |
| 500 | $\beta_{10}$ | 2.20       | 96.60 | 1.20 | 3.40       | 94.40 | 2.20 |
|     | $\beta_{11}$ | 0.80       | 96.40 | 2.80 | 1.80       | 94.40 | 3.80 |
|     | $\beta_{20}$ | 2.20       | 96.00 | 1.80 | 2.40       | 92.80 | 4.80 |
|     | $\beta_{21}$ | 2.20       | 95.40 | 2.40 | 3.00       | 94.60 | 2.40 |

Table 36: Coverage probabilities (%) of the HPDIs using zero-deflated artificial samples (Scenarios 3 and 4).

| $n$ | Parameter    | BNCP       | CP    | ANCP | BNCP       | CP    | ANCP |
|-----|--------------|------------|-------|------|------------|-------|------|
|     |              | Scenario 3 |       |      | Scenario 4 |       |      |
| 50  | $\beta_{10}$ | 3.20       | 96.80 | 0.00 | 2.20       | 97.80 | 0.00 |
|     | $\beta_{11}$ | 1.00       | 98.60 | 0.40 | 3.80       | 96.20 | 0.00 |
|     | $\beta_{20}$ | 1.00       | 97.40 | 1.60 | 0.00       | 96.40 | 3.60 |
|     | $\beta_{21}$ | 0.80       | 97.00 | 2.20 | 1.80       | 98.00 | 0.20 |
| 100 | $\beta_{10}$ | 2.60       | 96.60 | 0.80 | 3.00       | 96.20 | 0.80 |
|     | $\beta_{11}$ | 2.80       | 96.80 | 0.40 | 4.00       | 95.40 | 0.60 |
|     | $\beta_{20}$ | 2.00       | 95.80 | 2.20 | 0.20       | 96.80 | 3.00 |
|     | $\beta_{21}$ | 1.60       | 96.40 | 2.00 | 1.40       | 98.20 | 0.40 |
| 200 | $\beta_{10}$ | 2.20       | 96.80 | 1.00 | 2.40       | 96.20 | 1.40 |
|     | $\beta_{11}$ | 3.40       | 95.40 | 1.20 | 3.80       | 95.60 | 0.60 |
|     | $\beta_{20}$ | 1.80       | 95.60 | 2.60 | 1.20       | 94.40 | 4.40 |
|     | $\beta_{21}$ | 2.80       | 95.00 | 2.20 | 4.20       | 94.00 | 1.80 |
| 500 | $\beta_{10}$ | 1.60       | 96.20 | 2.20 | 3.00       | 95.20 | 1.80 |
|     | $\beta_{11}$ | 3.00       | 96.00 | 1.00 | 3.00       | 96.00 | 1.00 |
|     | $\beta_{20}$ | 2.40       | 94.00 | 3.60 | 2.80       | 94.80 | 2.40 |
|     | $\beta_{21}$ | 2.20       | 95.00 | 2.80 | 2.00       | 95.60 | 2.40 |

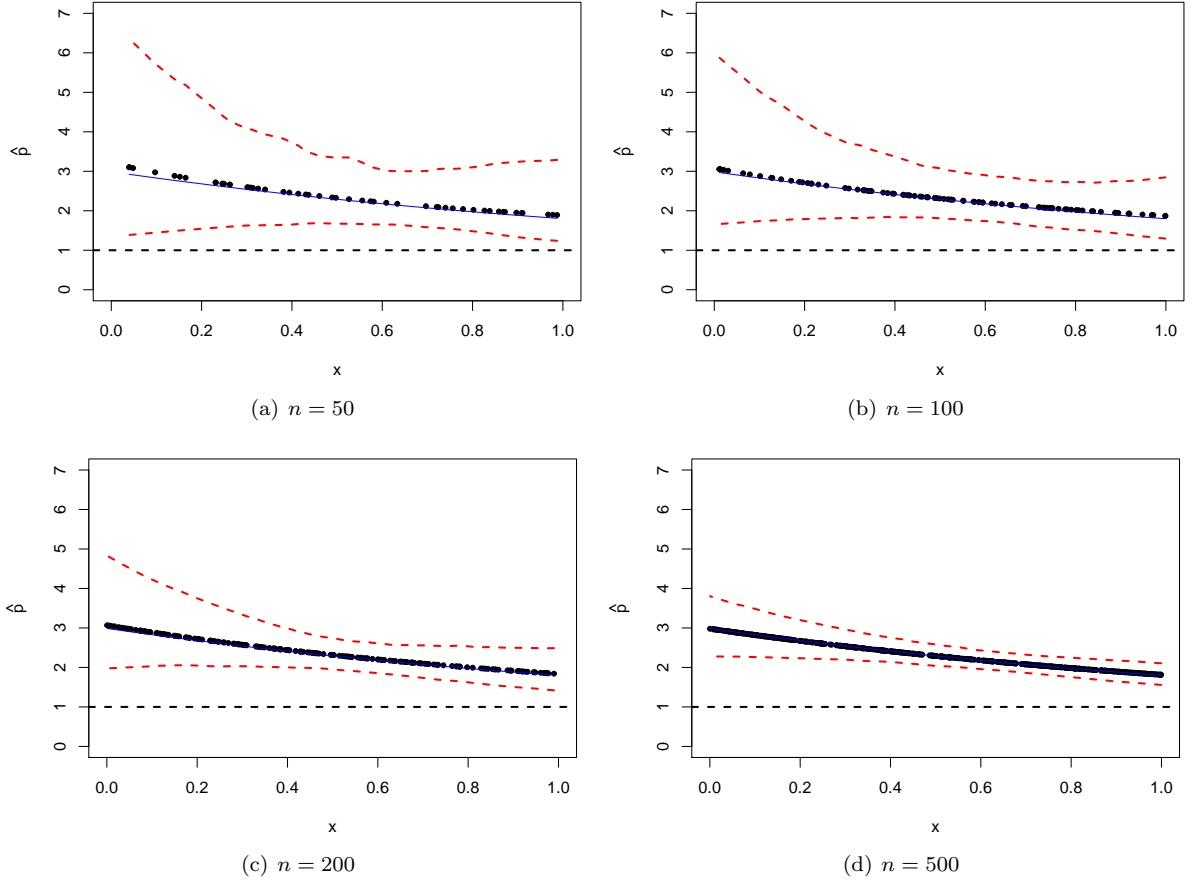

Figure 21: *Posterior* estimates for parameter  $p$  using zero-deflated artificial samples (Scenario 1).

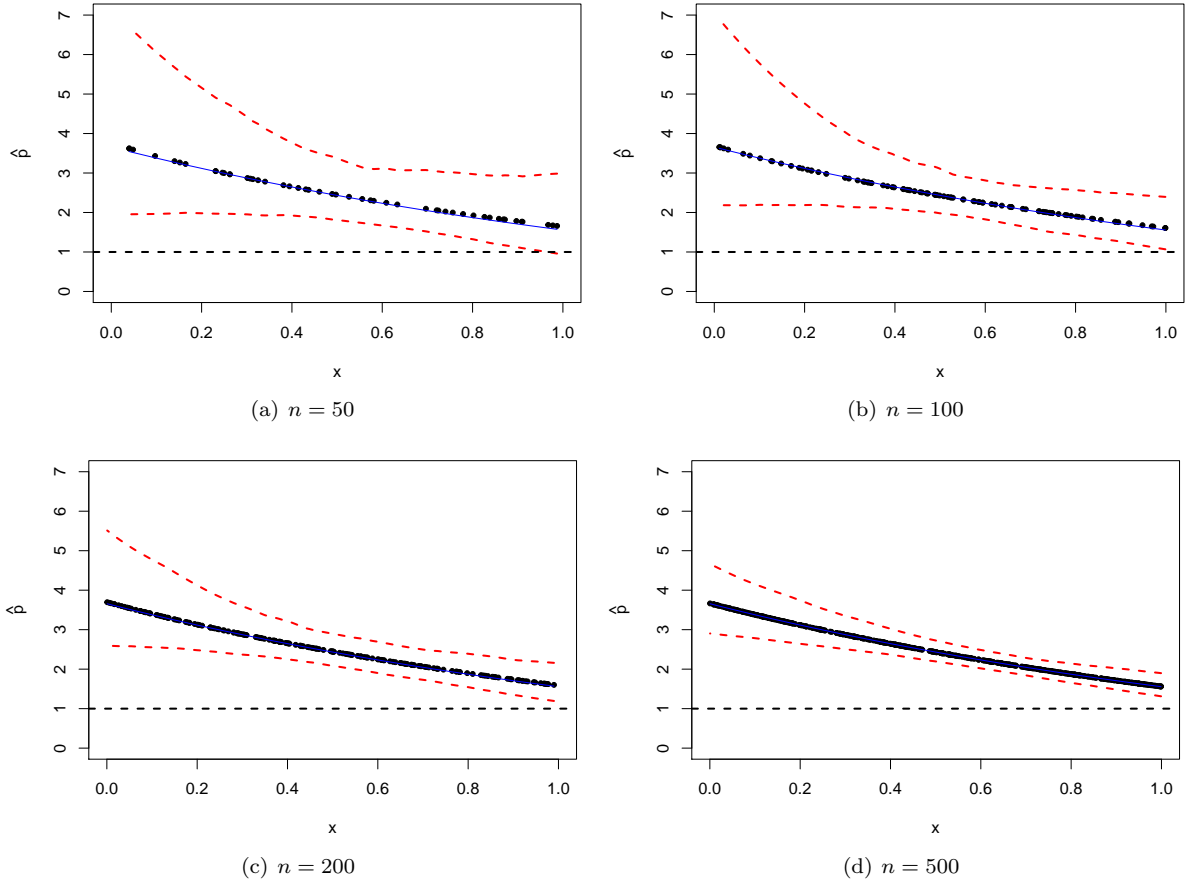

Figure 22: *Posterior* estimates for parameter  $p$  using zero-deflated artificial samples (Scenario 2).

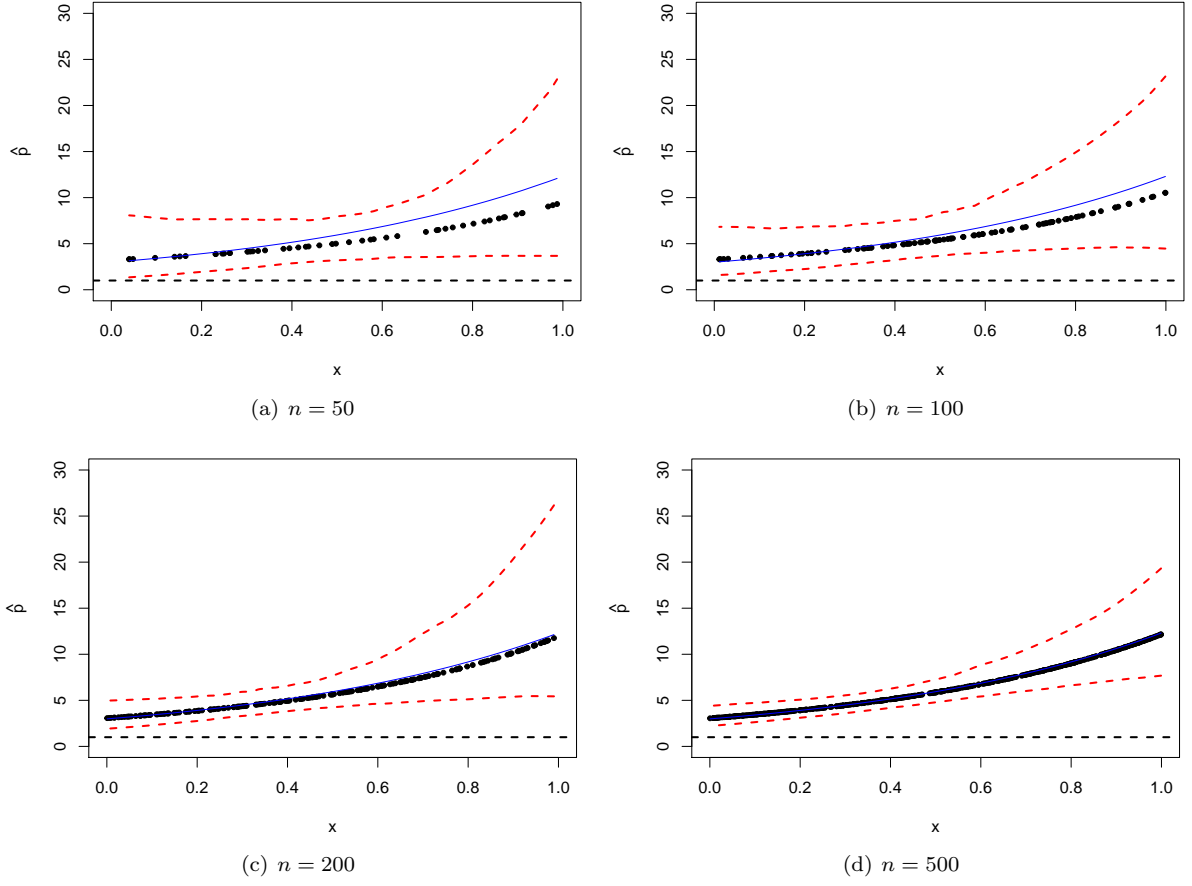

Figure 23: *Posterior estimates for parameter  $p$  using zero-deflated artificial samples (Scenario 3).*

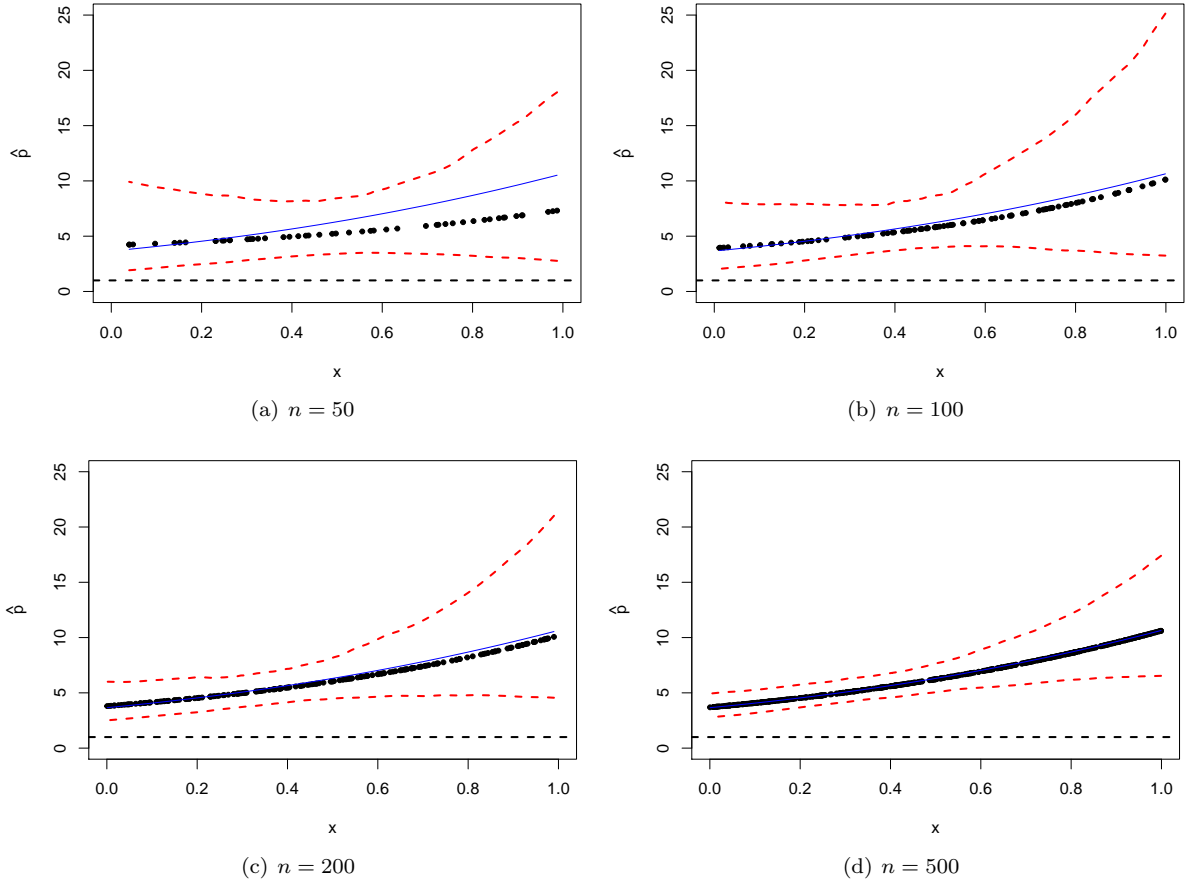

Figure 24: *Posterior estimates for parameter  $p$  using zero-deflated artificial samples (Scenario 4).*
